# Supplementary material
Source: PubMed Central journal article supplement (PMC6644512)
Supplement: ao8b01081_si_001.pdf [file ao8b01081_si_001.pdf]

# Supporting Information

## Sustainable Generation of Ni(OH)<sub>2</sub> Nanoparticles for the Green Synthesis of 5-Substituted 1*H*-Tetrazoles: A Competent Turn on Fluorescence Sensing of H<sub>2</sub>O<sub>2</sub>

Mita Halder,<sup>a</sup> Md. Mominul Islam,<sup>b</sup> Pritam Singh,<sup>a</sup> Anupam Singha Roy,<sup>c\*</sup> Sk. Manirul Islam,<sup>b\*</sup> and Kamalika Sen<sup>a\*</sup>

<sup>a</sup>Department of Chemistry, University of Calcutta, 92 APC Road, Kolkata 700 009, India

<sup>b</sup>Department of Chemistry, University of Kalyani, Kalyani, Nadia, 741235, W.B., India

<sup>c</sup>European Bioenergy Research Institute, Aston University, Birmingham B4 7ET, UK.

Number of pages: **30**

Number of figures: **24**

| <b>Table of contents</b>                                                                                    | <b>Page</b> |
|-------------------------------------------------------------------------------------------------------------|-------------|
| <sup>1</sup> H and <sup>13</sup> C NMR data of all products of Table 2,<br>Table 3, Table 4 and Scheme 4    | S2-S5       |
| <sup>1</sup> H and <sup>13</sup> C NMR spectra of all products of Table 2,<br>Table 3, Table 4 and Scheme 4 | S6-S26      |
| ESIMS of compound 6 and H <sub>2</sub> O <sub>2</sub> treated compound 6                                    | S26-S27     |
| Comparative Study for H <sub>2</sub> O <sub>2</sub> sensing (Table S1)                                      | S27         |
| Comparative Study for the catalytic activity of Ni(OH) <sub>2</sub> NPs (Table S2)                          | S28         |
| FTIR of the reused catalyst                                                                                 | S28         |
| Reference                                                                                                   | S29-S30     |

## **<sup>1</sup>H and <sup>13</sup>C NMR data of all products**

**5-phenyl-1H-tetrazole (Table 2, 2a):** White solid; *mp*: 215-216 °C, [lit.<sup>1</sup> 217-219 °C]; <sup>1</sup>H NMR (400 MHz, DMSO-D<sub>6</sub>) δ 8.04-8.03 (m, 2H), 7.45-7.44 (m, 3H). <sup>13</sup>C NMR (75 MHz, DMSO-D<sub>6</sub>) δ 156.5, 132.6, 129.7, 127.8, 124.4; Elemental analysis for C<sub>7</sub>H<sub>6</sub>N<sub>4</sub>; Calculated: C, 57.53; H, 4.14; N, 38.34. Found: C, 57.98; H, 4.02; N, 38.08.

**5-(p-tolyl)-1H-tetrazole (Table 2, 2b):** Colourless crystal; *mp*: 244-245 °C, [lit.<sup>2</sup> 246-248 °C]; <sup>1</sup>H NMR (400 MHz, CDCl<sub>3</sub>) δ 7.65-7.63 (m, 2H), 7.19-7.17 (m, 2H), 5.96 (bs, 1H), 2.33 (s, 3H); <sup>13</sup>C NMR (100 MHz, CDCl<sub>3</sub>) δ 169.4, 142.5, 130.4, 129.2, 127.3, 21.4; Elemental analysis for C<sub>8</sub>H<sub>8</sub>N<sub>4</sub>; Calculated: C, 59.99; H, 5.03; N, 34.98. Found: C, 59.02; H, 4.89; N, 34.68.

**5-(2-nitrophenyl)-1H-tetrazole (Table 2, 2c):** Pale yellow solid; *mp*: 157-158 °C, [lit.<sup>2</sup> 158-161 °C]; <sup>1</sup>H NMR (400 MHz, CDCl<sub>3</sub>) δ 7.66-7.65 (m, 1H), 7.47-7.45 (m, 1H), 7.28 (m, 1H), 7.07-7.05 (m, 1H); <sup>13</sup>C NMR (75 MHz, CDCl<sub>3</sub>) δ 164.1, 151.5, 134.0, 133.6, 131.3, 126.4, 120.4; Elemental analysis for C<sub>7</sub>H<sub>5</sub>N<sub>5</sub>O<sub>2</sub>; Calculated: C, 43.98; H, 2.64; N, 36.64. Found C, 44.20; H, 2.22; N, 36.05.

**5-(3-nitrophenyl)-1H-tetrazole (Table 2, 2d):** Pale yellow solid; *mp*: 154-155 °C, [lit.<sup>1</sup> 155-157 °C]; <sup>1</sup>H NMR (400 MHz, DMSO-D<sub>6</sub>) δ 8.75 (bs, 1H), 8.28-8.23 (m, 2H), 7.95 (bs, 1H), 7.60-7.55 (m 1H); <sup>13</sup>C NMR (100 MHz, DMSO-D<sub>6</sub>) δ 166.9, 147.9, 135.4, 133.9, 129.4, 125.9, 122.7; Elemental analysis for C<sub>7</sub>H<sub>5</sub>N<sub>5</sub>O<sub>2</sub>; Calculated: C, 43.98; H, 2.64; N, 36.64. Found: C, 43.11; H, 2.40; N, 36.60.

**5-(4-nitrophenyl)-1H-tetrazole (Table 2, 2e):** Yellow solid; *mp*: 218-219 °C, [lit.<sup>2</sup> 218-220 °C]; <sup>1</sup>H NMR (400 MHz, CDCl<sub>3</sub>) δ 8.26-8.24 (m, 2H), 7.93-7.91 (m, 2H), 6.09. (bs, 1H); <sup>13</sup>C NMR (100 MHz, CDCl<sub>3</sub>) δ 161.9, 148.1, 139.7, 128.5, 123.9; Elemental analysis for C<sub>7</sub>H<sub>5</sub>N<sub>5</sub>O<sub>2</sub>; Calculated: C, 43.98; H, 2.64; N, 36.64. Found: C, 43.75; H, 2.30; N, 36.12.

**5-(4-chlorophenyl)-1H-tetrazole (Table 2, 2f):** Pale brown solid; *mp*: 248-249 °C, [lit.<sup>3</sup> 249-250 °C]; <sup>1</sup>H NMR (400 MHz, DMSO-D<sub>6</sub>) δ 7.79-7.78 (m, 2H), 7.34-7.33 (m, 2H), 7.27 (bs, 1H); <sup>13</sup>C NMR (100 MHz, DMSO-D<sub>6</sub>) δ 168.3, 137.5, 132.1, 129.1, 128.4; Elemental analysis for C<sub>7</sub>H<sub>5</sub>ClN<sub>4</sub>; Calculated: C, 46.55; H, 2.79; N, 31.02. Found: C, 46.02; H, 2.85; N, 30.88.

**5-(4-bromophenyl)-1H-tetrazole (Table 2, 2h):** Light yellow solid; *mp*: 263-264 °C, [lit.<sup>4</sup> 267-268 °C]; <sup>1</sup>H NMR (400 MHz, DMSO-D<sub>6</sub>) δ 7.74-7.72 (m, 2H), 7.54 (bs, 1H), 7.50-7.45 (m, 2H); <sup>13</sup>C NMR (100 MHz, DMSO-D<sub>6</sub>) δ 168.3, 132.6, 131.2, 129.3, 125.9; Elemental analysis for C<sub>7</sub>H<sub>5</sub>BrN<sub>4</sub>; Calculated: C, 37.36; H, 2.24; N, 24.90. Found: C, 37.28; H, 2.11; N, 24.80.

**5-(3,4-dimethoxyphenyl)-1H-tetrazole (Table 2, 2i):** Off-white solid; *mp*: 198-199 °C, [lit.<sup>5</sup> 198-200 °C]; <sup>1</sup>H NMR (400 MHz, CDCl<sub>3</sub>) δ 7.39 (m, 1H), 7.28-7.25 (m, 1H), 6.81-6.79 (m, 1H), 5.97 (bs, 1H), 3.86 (s, 3H), 3.84 (s, 3H); <sup>13</sup>C NMR (100 MHz, CDCl<sub>3</sub>) δ 169.1, 152.1, 149.0, 125.8, 120.1, 110.8, 110.2, 56.0; ; Elemental analysis for C<sub>9</sub>H<sub>10</sub>N<sub>4</sub>O<sub>2</sub>; Calculated: C, 52.42; H, 4.89; N, 27.17. Found: C, 52.12; H, 4.67; N, 26.99.

**5-(4-methoxyphenyl)-1H-tetrazole (Table 2, 2j):** White solid; *mp*: 230-231 °C, [lit.<sup>1</sup> 233-234 °C]; <sup>1</sup>H NMR (400 MHz, DMSO-D<sub>6</sub>) δ 7.77-7.74 (m, 2H), 6.86-6.83 (m, 2H), 5.96 (bs, 1H), 3.78 (s, 3H); <sup>13</sup>C NMR (100 MHz, DMSO-D<sub>6</sub>) δ 168.9, 162.3, 129.3, 125.8, 113.5, 55.3; Elemental analysis for C<sub>8</sub>H<sub>8</sub>N<sub>4</sub>O; Calculated: C, 54.54; H, 4.58; N, 31.80. Found: C, 54.48; H, 4.62; N, 31.63.

**2-(1H-tetrazol-5-yl)phenol (Table 2, 2k):** Whitish solid; *mp*: 217-218 °C, [lit.<sup>1</sup> 219-221 °C]; <sup>1</sup>H NMR (400 MHz, CDCl<sub>3</sub>) δ 7.48-7.45 (m, 1H), 7.10-7.08 (m, 2H), 7.06-7.03 (m, 1H); <sup>13</sup>C NMR (100 MHz, CDCl<sub>3</sub>) δ 164.0, 153.5, 132.9, 131.0, 119.6, 117.4, 114.1; Elemental analysis for C<sub>7</sub>H<sub>6</sub>N<sub>4</sub>O; Calculated: C, 51.85; H, 3.73; N, 34.55. Found: C, 51.08; H, 3.92; N, 34.11.

**4-(1H-tetrazol-5-yl)phenol (Table 2, 2l):** White solid; *mp*: 235-236 °C, [lit.<sup>2</sup> 238-240 °C]; <sup>1</sup>H NMR (400 MHz, CDCl<sub>3</sub>) δ 7.47-7.45 (m, 2H), 6.86-6.84 (m, 2H), 6.05 (bs, 1H); <sup>13</sup>C NMR (100 MHz, CDCl<sub>3</sub>) δ 163.1, 160.3, 134.2, 132.6, 116.4; Elemental analysis for C<sub>7</sub>H<sub>6</sub>N<sub>4</sub>O; Calculated: C, 51.85; H, 3.73; N, 34.55. Found: C, 51.17; H, 3.52; N, 34.42.

**5-methyl-2-(1H-tetrazol-5-yl)phenol (Table 2, 2m):** Off-white solid; <sup>1</sup>H NMR (400 MHz, CDCl<sub>3</sub>) δ 7.31-7.29 (m, 1H), 6.73-6.69 (m, 2H), 2.27 (s, 3H); <sup>13</sup>C NMR (100 MHz, CDCl<sub>3</sub>) δ 158.6, 146.1, 132.5, 128.8, 121.9, 117.0, 116.9, 21.8; Elemental analysis for C<sub>8</sub>H<sub>8</sub>N<sub>4</sub>O; Calculated: C, 54.54; H, 4.58; N, 31.80. Found: C, 54.04; H, 4.60; N, 31.42.

**5-(furan-2-yl)-1H-tetrazole (Table 3, 3a):** Colourless solid; *mp*: 204-205 °C, [lit.<sup>6</sup> 206-208 °C]; <sup>1</sup>H NMR (400 MHz, DMSO-D<sub>6</sub>) δ 7.42 (t, *J* = 0.8 Hz, 1H), 7.07-7.06 (m, 1H), 6.66 (bs, 1H), 6.44 (dd, *J* = 3.2, 1.6 Hz, 1H); <sup>13</sup>C NMR (100 MHz, DMSO-D<sub>6</sub>) δ 160.0, 148.2, 145.5, 114.2, 112.3; Elemental analysis for C<sub>5</sub>H<sub>4</sub>N<sub>4</sub>O; Calculated: C, 44.12; H, 2.96; N, 41.16. Found: C, 43.95; H, 2.90; N, 41.10.

**5-(thiophen-2-yl)-1H-tetrazole (Table 3, 3b):** Off-white solid; *mp*: 203-204 °C, [lit.<sup>7</sup> 205-206 °C]; <sup>1</sup>H NMR (400 MHz, DMSO-D<sub>6</sub>) δ 7.59-7.58 (m, 1H), 7.44-7.43 (m, 1H), 7.01 (dd, *J* = 4.8, 4.0 Hz, 1H), 6.23 (bs, 1H); <sup>13</sup>C NMR (100 MHz, DMSO-D<sub>6</sub>) δ 163.9, 138.7, 130.5, 129.1, 127.6; Elemental analysis for C<sub>5</sub>H<sub>4</sub>N<sub>4</sub>S; Calculated: C, 39.46; H, 2.65; N, 36.82. Found: C, 39.16; H, 2.78; N, 36.56.

**2-(1H-tetrazol-5-yl)pyridine (Table 3, 3c):** Pale brown solid; *mp*: 210-211 °C, [lit.<sup>4</sup> 211-213 °C]; <sup>1</sup>H NMR (400 MHz, CDCl<sub>3</sub>) δ 8.52-8.50 (m, 1H), 8.15-8.13 (m, 1H), 7.82-7.77 (m, 2H), 7.40-7.37 (m, 1H); <sup>13</sup>C NMR (100 MHz, CDCl<sub>3</sub>) δ 166.9, 149.6, 148.3, 137.3, 126.5, 122.4; Elemental analysis for C<sub>6</sub>H<sub>5</sub>N<sub>5</sub>; Calculated: C, 48.98; H, 3.43; N, 47.60. Found: C, 48.37; H, 3.10; N, 47.78.

**2-(1H-tetrazol-5-yl)quinoline (Table 3, 3d):** Brownish solid; <sup>1</sup>H NMR (400 MHz, CDCl<sub>3</sub>) δ 8.22 (m, 2H), 8.03-8.01 (m, 2H), 7.80-7.78 (m, 1H), 7.69-7.66 (m, 1H), 7.55-7.52 (m, 1H); <sup>13</sup>C NMR (100 MHz, CDCl<sub>3</sub>) δ 166.7, 150.3, 148.8, 137.0, 129.6, 129.3, 128.8, 127.6, 127.2, 118.3; Elemental analysis for C<sub>10</sub>H<sub>7</sub>N<sub>5</sub>; Calculated: C, 60.91; H, 3.58; N, 35.51. Found: C, 60.52; H, 3.21; N, 35.04.

**1H-tetrazole (Table 4, 4a):** Colourless solid; 154-155 °C, [lit.<sup>8</sup> 154 °C]; <sup>1</sup>H NMR (400 MHz, DMSO-D<sub>6</sub>) δ 8.81 (s, 1H), 6.82 (bs, 1H); <sup>13</sup>C NMR (100 MHz, DMSO-D<sub>6</sub>) δ 142.9; Elemental analysis for CH<sub>2</sub>N<sub>4</sub>; Calculated: C, 17.15; H, 2.88; N, 79.98. Found: C, 17.26; H, 2.79; N, 79.03.

**5-hexyl-1H-tetrazole (Table 4, 4b):** Colourless viscous oil; <sup>1</sup>H NMR (400 MHz, CDCl<sub>3</sub>) δ 2.87 (t, *J* = 7.6 Hz, 2H), 1.57-1.52 (m, 2H), 1.30-1.21 (m, 6H), 0.81 (t, *J* = 6.8 Hz, 3H); <sup>13</sup>C NMR (100 MHz, CDCl<sub>3</sub>) δ 159.4, 31.5, 29.7, 25.4, 24.8, 22.5, 14.0; Elemental analysis for C<sub>7</sub>H<sub>14</sub>N<sub>4</sub>; Calculated: C, 54.52; H, 9.15; N, 36.33. Found: C, 54.36; H, 8.88; N, 36.10.

**(E)-5-styryl-1H-tetrazole (Table 4, 4c):** Colourless solid; *mp*: 153-154 °C, [lit.<sup>9</sup> 155-156 °C]; <sup>1</sup>H NMR (400 MHz, CDCl<sub>3</sub>) δ 7.47-7.44 (m, 2H), 7.32-7.29 (m, 3H), 6.41-6.37 (d, *J* = 15.6 Hz, 2H), 6.52 (bs, 1H); <sup>13</sup>C NMR (75 MHz, CDCl<sub>3</sub>) δ 155.8, 137.2, 134.2, 128.6, 128.1, 126.6, 110.1; Elemental analysis for C<sub>9</sub>H<sub>8</sub>N<sub>4</sub>; Calculated: C, 62.78; H, 4.68; N, 32.54. Found: C, 62.80; H, 4.32; N, 32.19.

**9-(4-iodophenyl)-9H-carbazole (Scheme 4, Compound 5):** <sup>1</sup>H NMR (400 MHz, CDCl<sub>3</sub>) δ 8.01 (d, *J* = 7.2 Hz, 2H), 7.77 (d, *J* = 7.2 Hz, 2H), 7.30-7.24 (m, 4H), 7.19-7.15 (m, 4H).

**9-(4-(5-(quinolin-2-yl)-1H-tetrazol-1-yl)phenyl)-9H-carbazole (Scheme 4, Compound 6):** <sup>1</sup>H NMR (400 MHz, CDCl<sub>3</sub>) δ: 8.36 (dd, *J* = 16.8, 8.4 Hz, 2H), 8.16 (d, *J* = 8.4 Hz, 1H), 8.08 (d, *J* = 8.0 Hz, 2H), 8.03 (d, *J* = 8.8 Hz, 2H), 7.87 (d, *J* = 8.0 Hz, 1H), 7.79-7.75 (m, 1H), 7.61 (t, *J* = 6.0 Hz, 1H), 7.54 (d, *J* = 8.8 Hz, 2H), 7.36-7.35 (m, 4H), 7.24-7.20 (m, 2H); <sup>13</sup>C NMR (100 MHz, CDCl<sub>3</sub>) δ: 162.4, 149.4, 146.3, 141.0, 138.1, 137.0, 133.6, 130.5, 129.7, 129.5, 128.3, 127.9, 125.9, 123.3, 121.1, 120.3, 119.9, 118.8, 109.7.

# $^1\text{H}$ and $^{13}\text{C}$ NMR spectra of all products

**Figure S1.**  $^1\text{H}$  and  $^{13}\text{C}$  NMR Spectra of 5-phenyl-1*H*-tetrazole (**2a**)

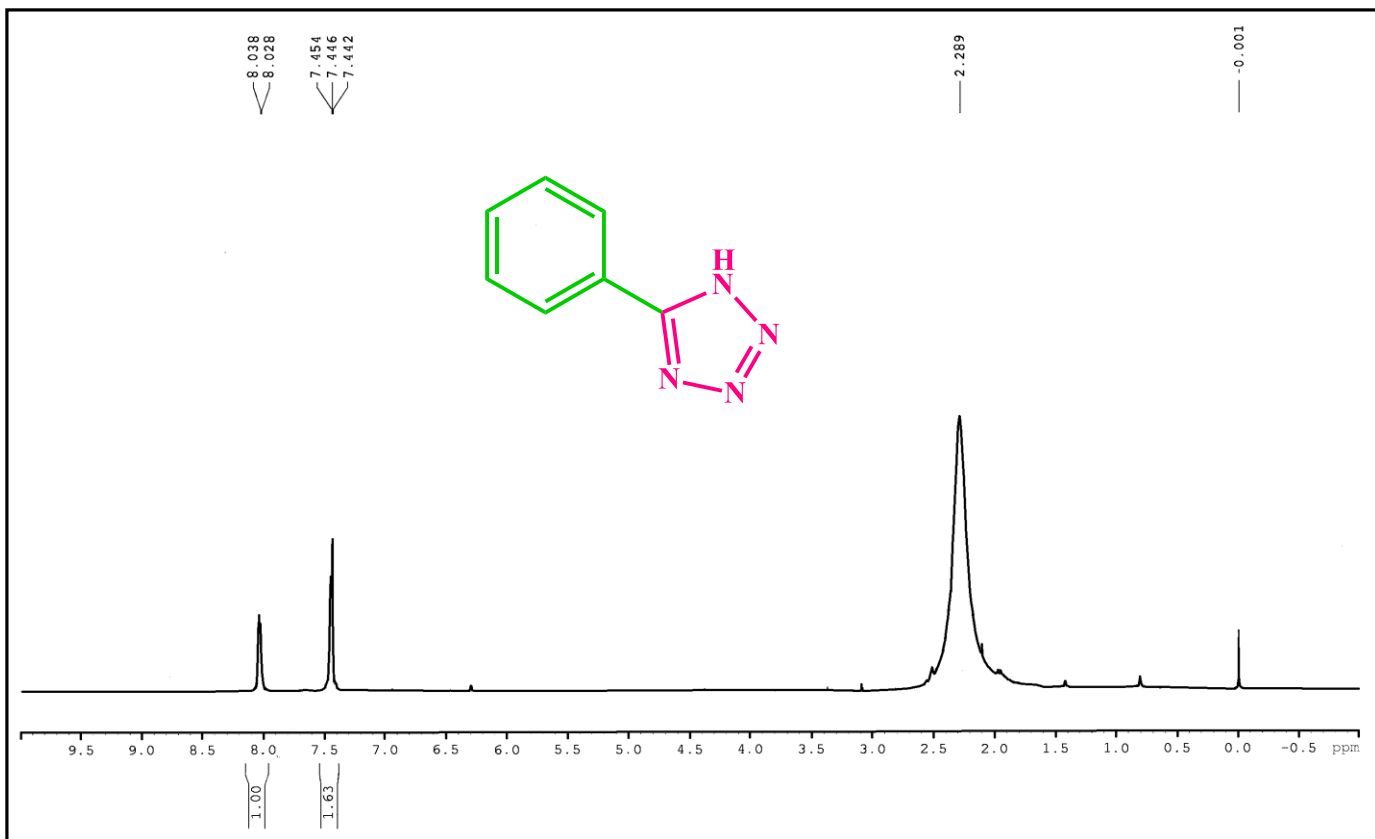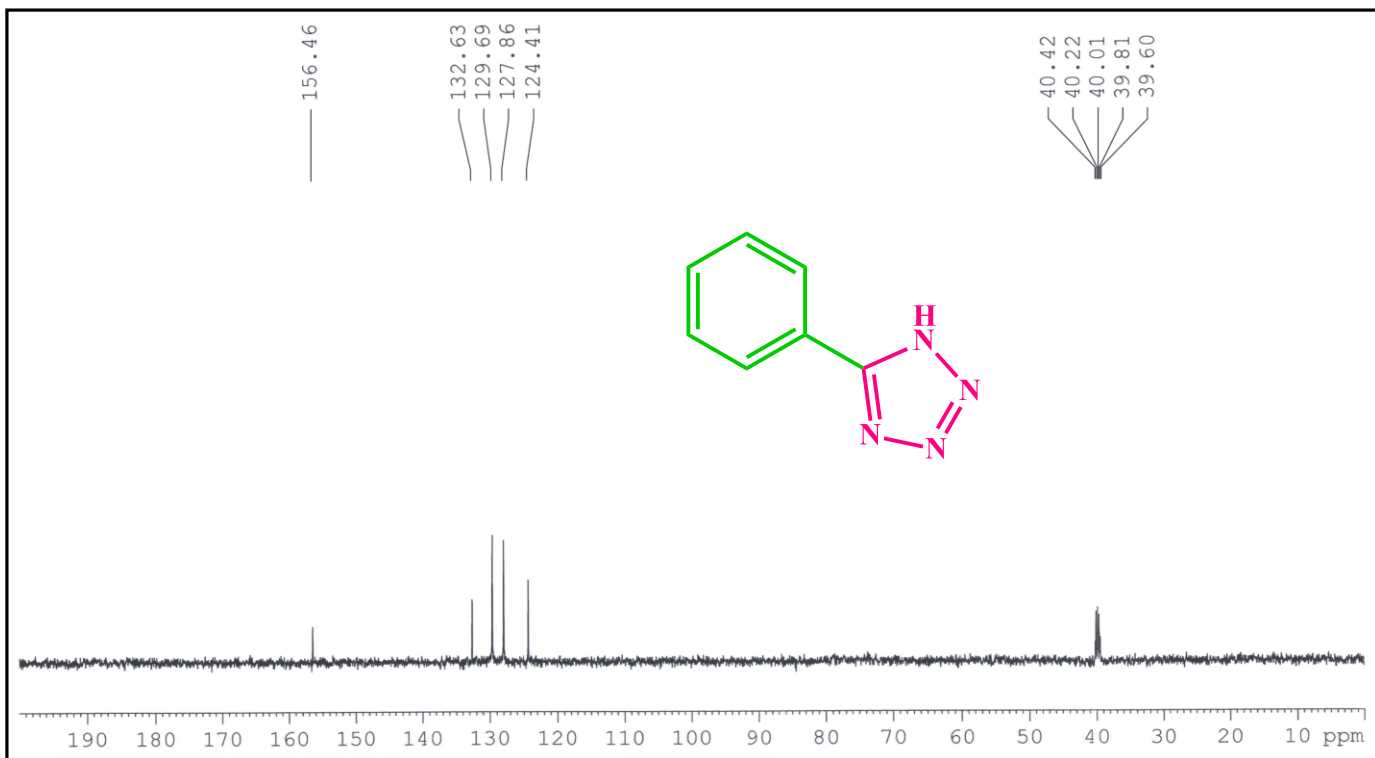

**Figure S2.**  $^1\text{H}$  and  $^{13}\text{C}$  NMR Spectra of 5-(p-tolyl)-1*H*-tetrazole (**2b**)

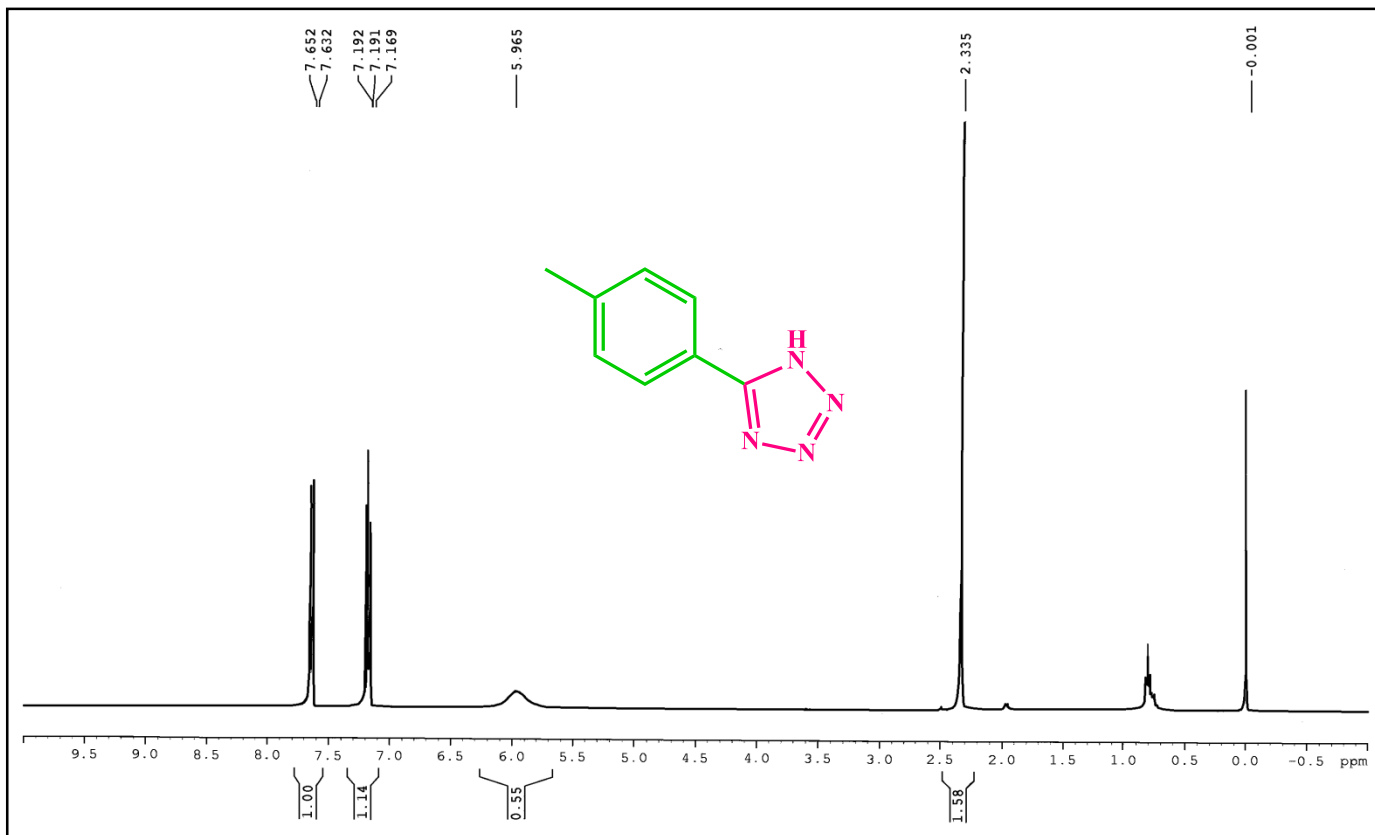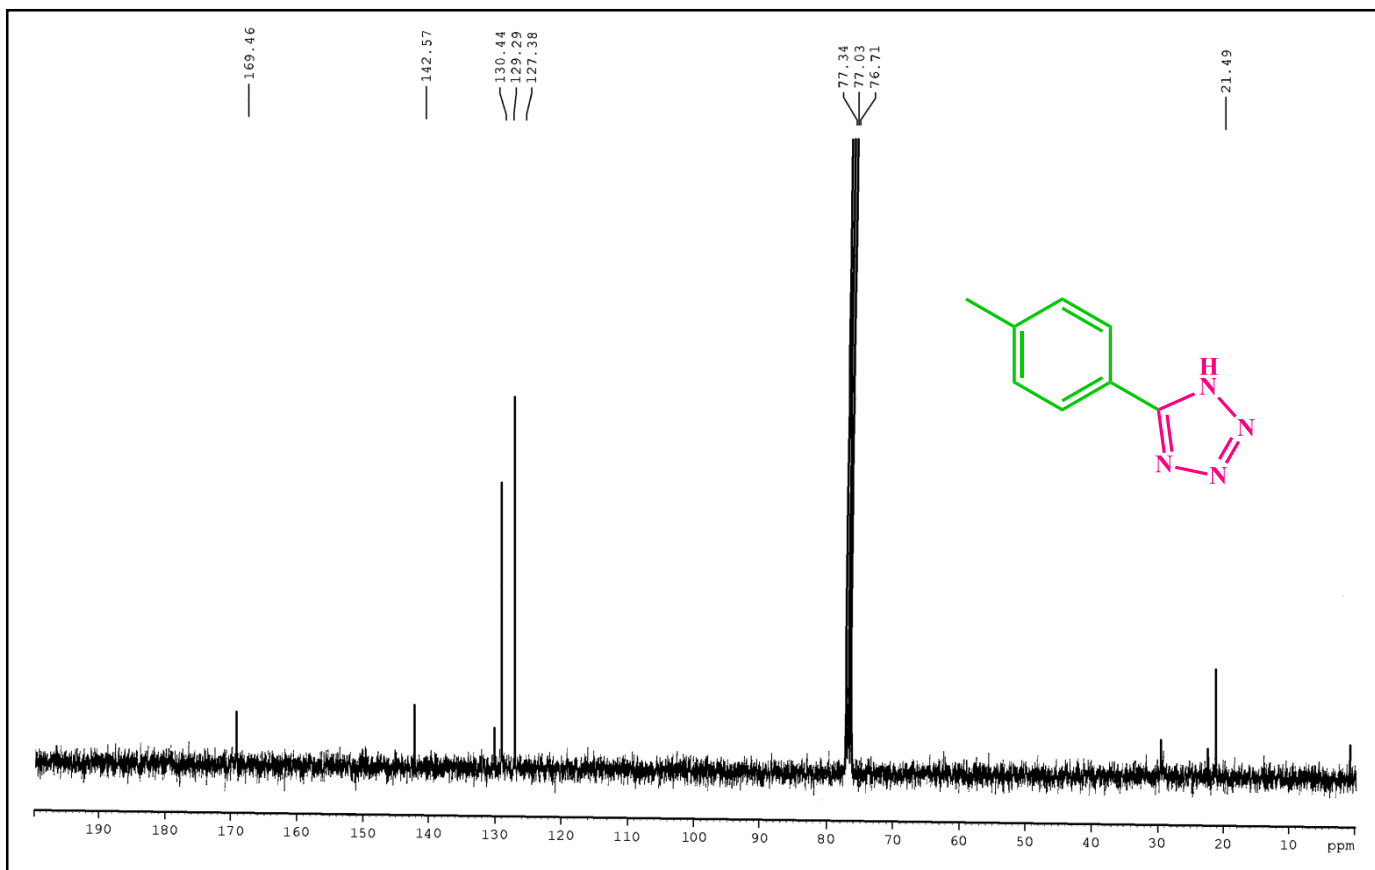

**Figure S3.**  $^1\text{H}$  and  $^{13}\text{C}$  NMR Spectra of 5-(2-nitrophenyl)-1*H*-tetrazole (**2c**)

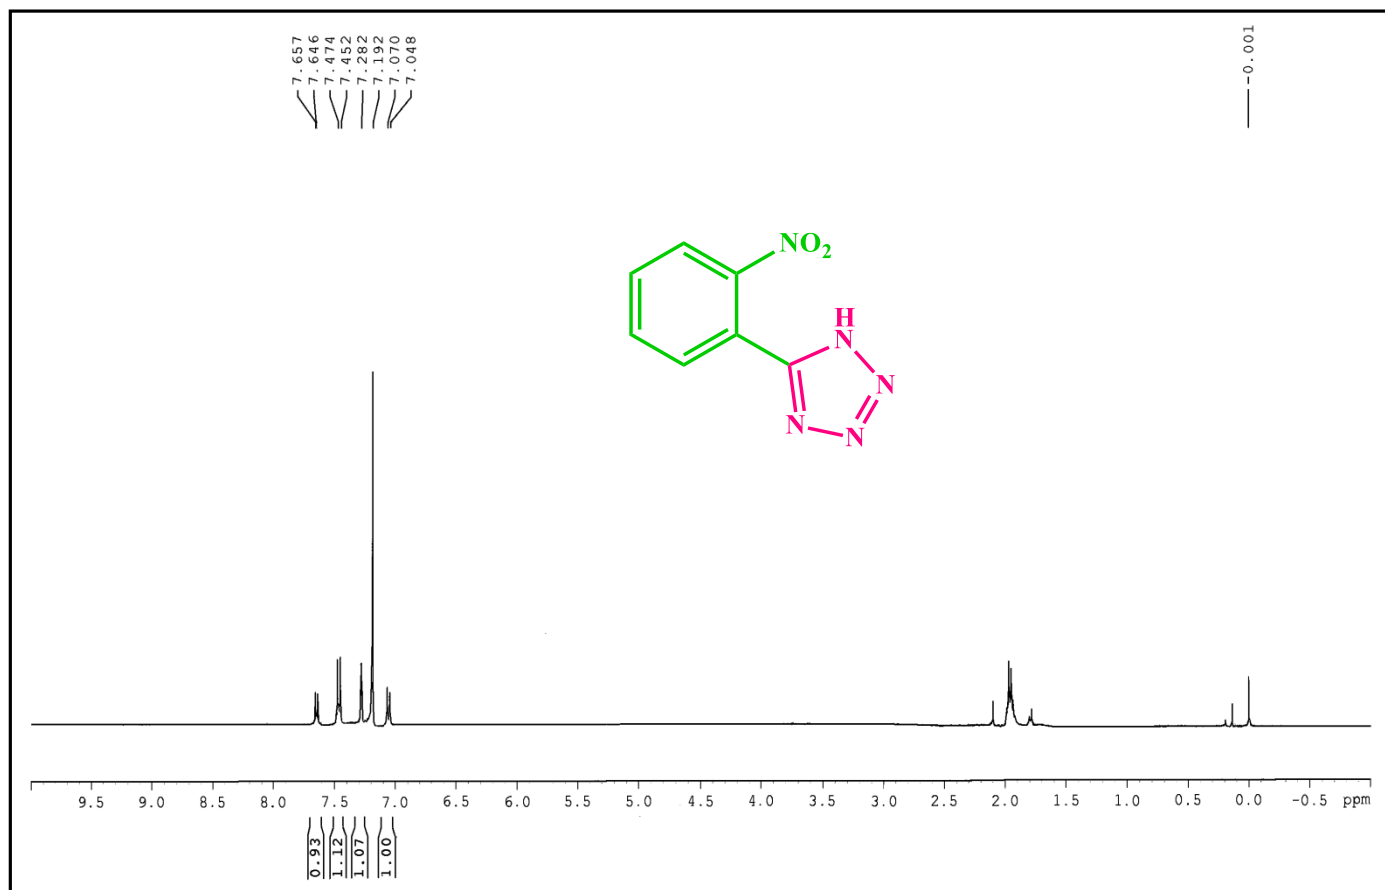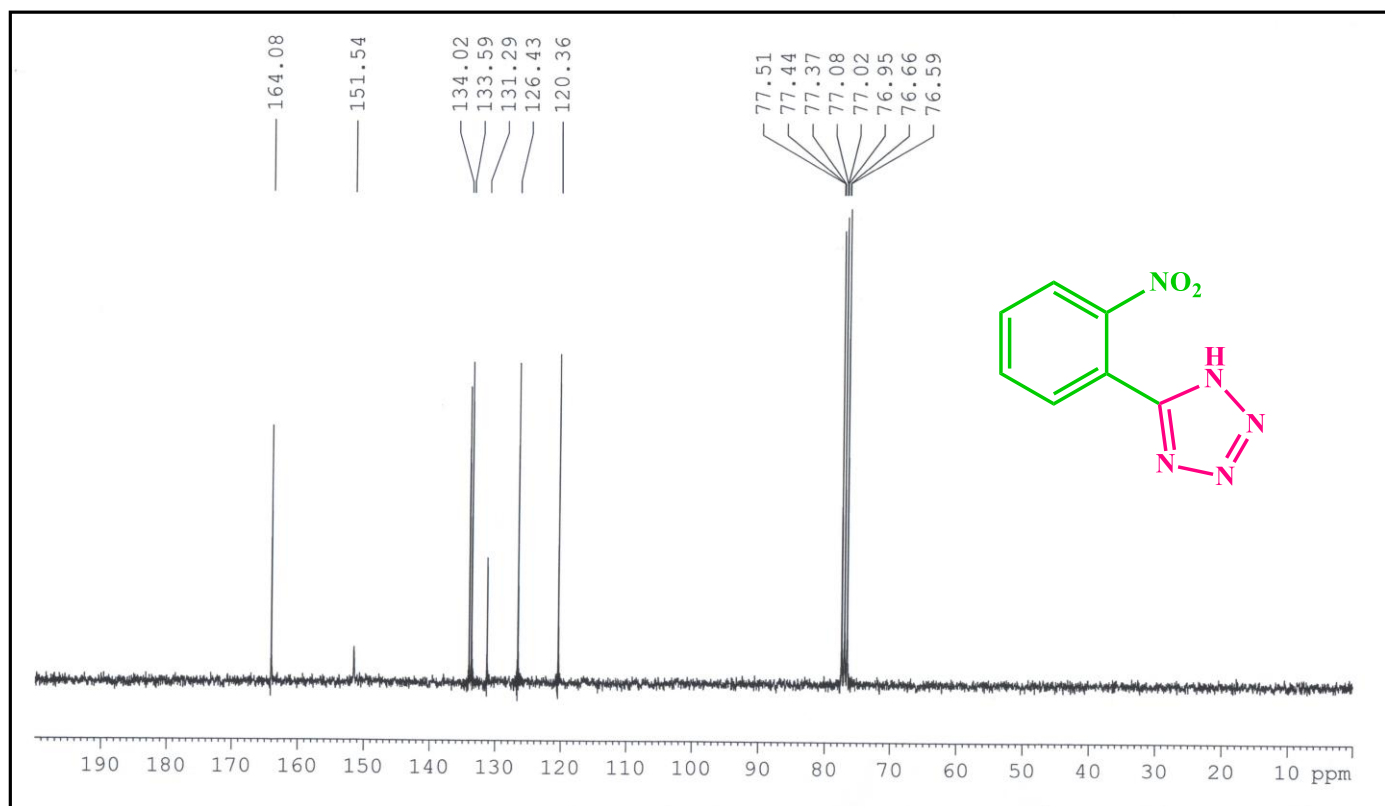



**Figure S4.**  $^1\text{H}$  and  $^{13}\text{C}$  NMR Spectra of 5-(3-nitrophenyl)-1*H*-tetrazole (**2d**)

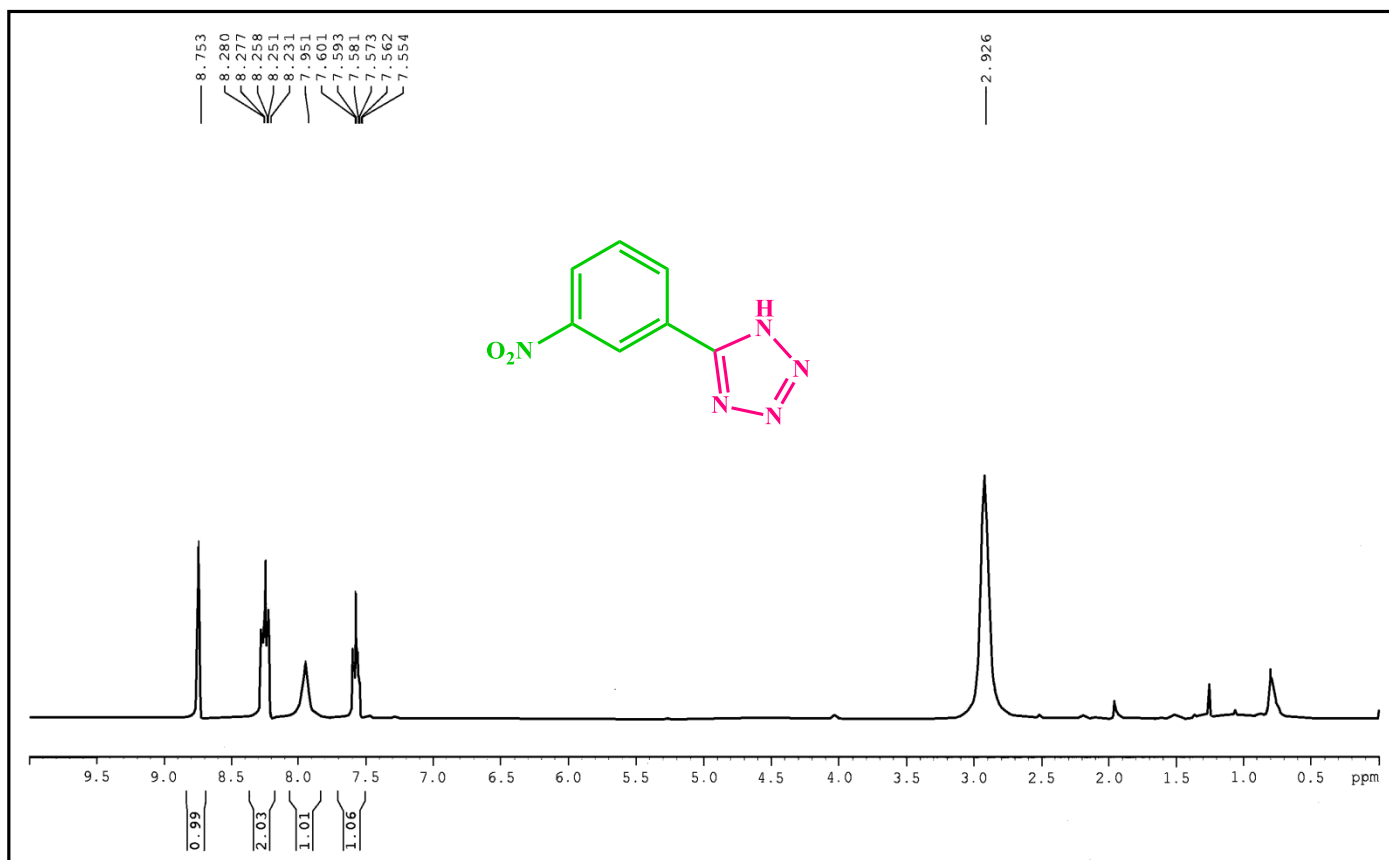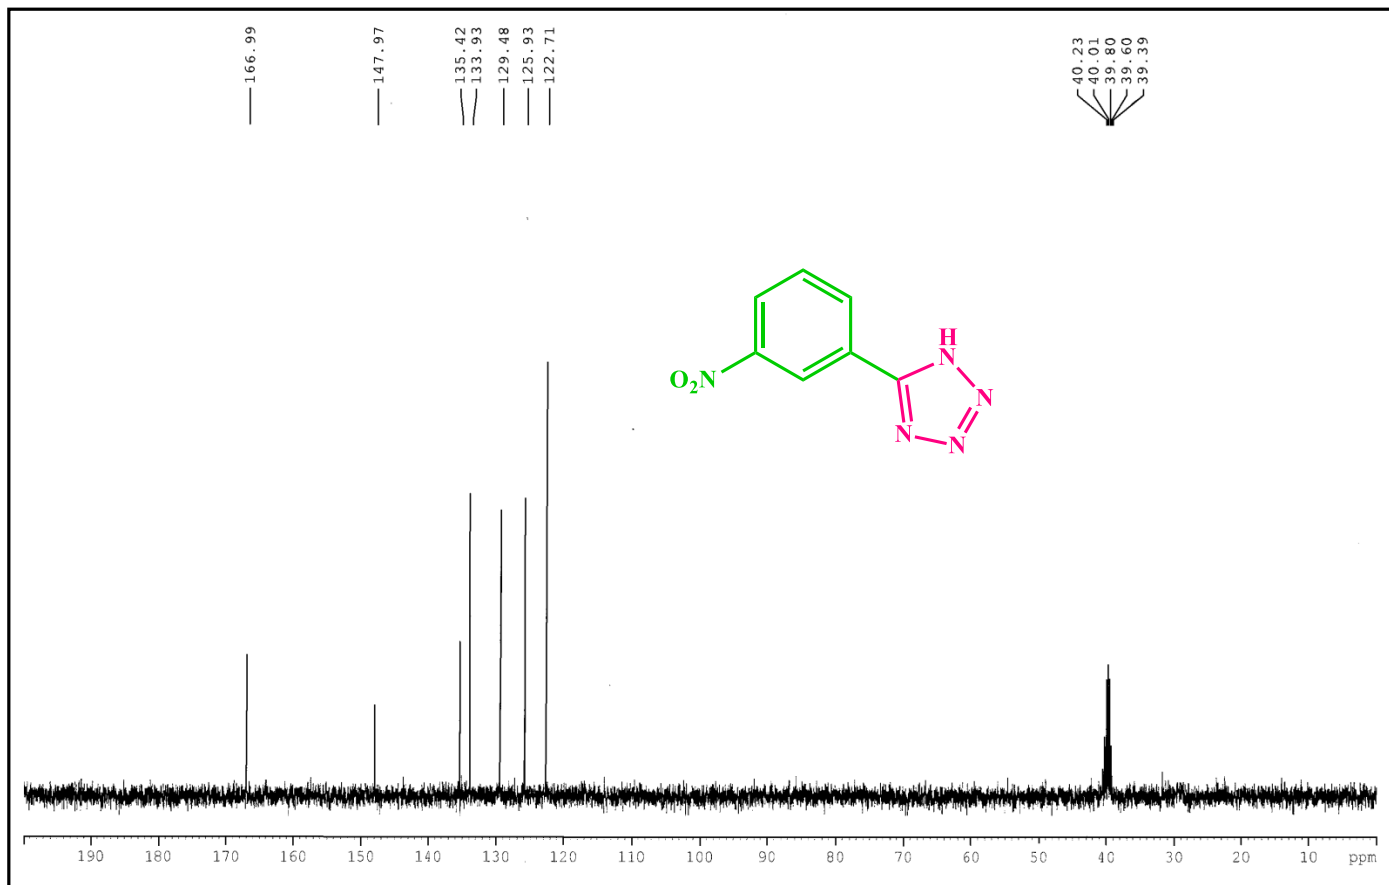

**Figure S5.**  $^1\text{H}$  and  $^{13}\text{C}$  NMR Spectra of 5-(4-nitrophenyl)-1*H*-tetrazole (**2e**)

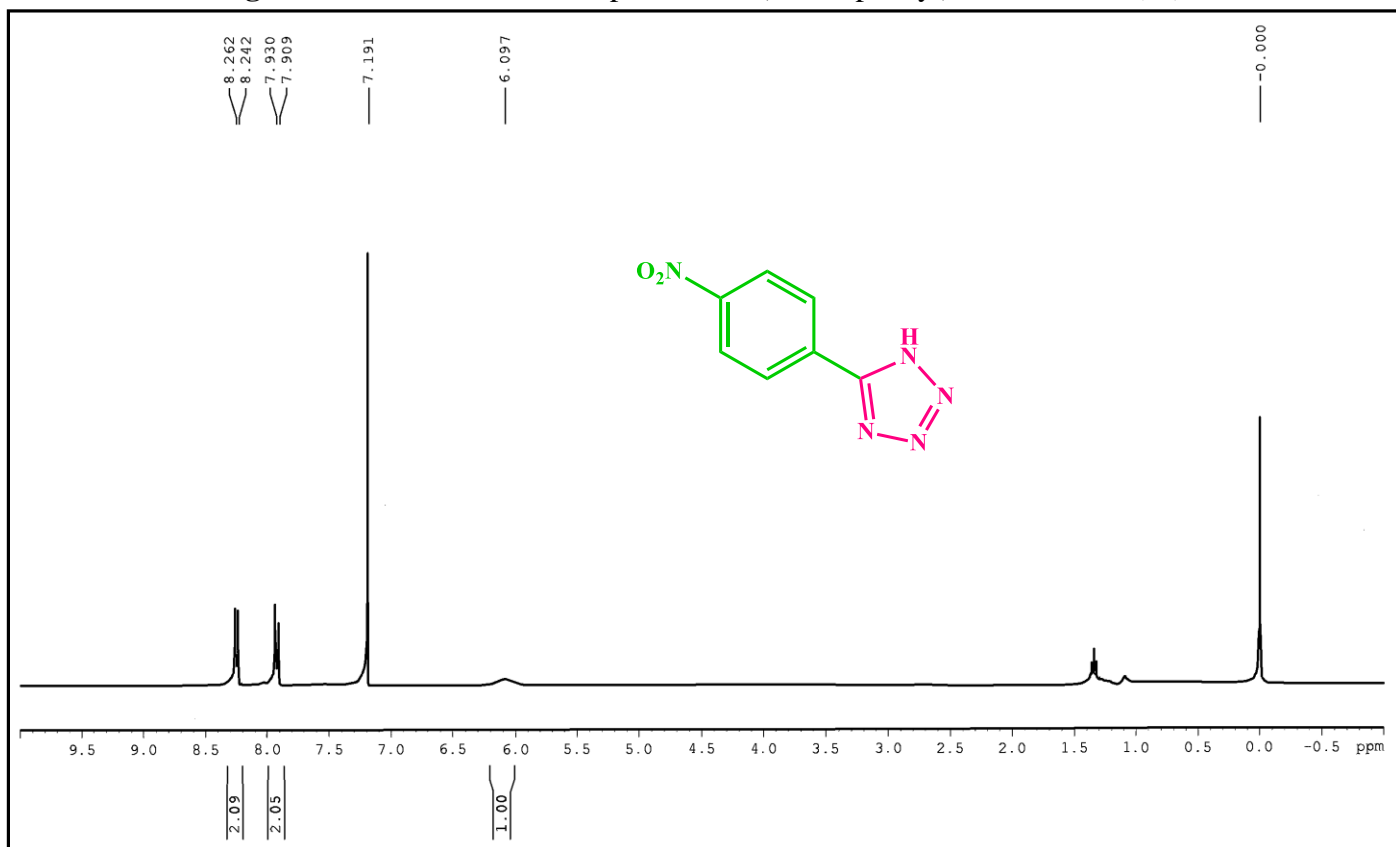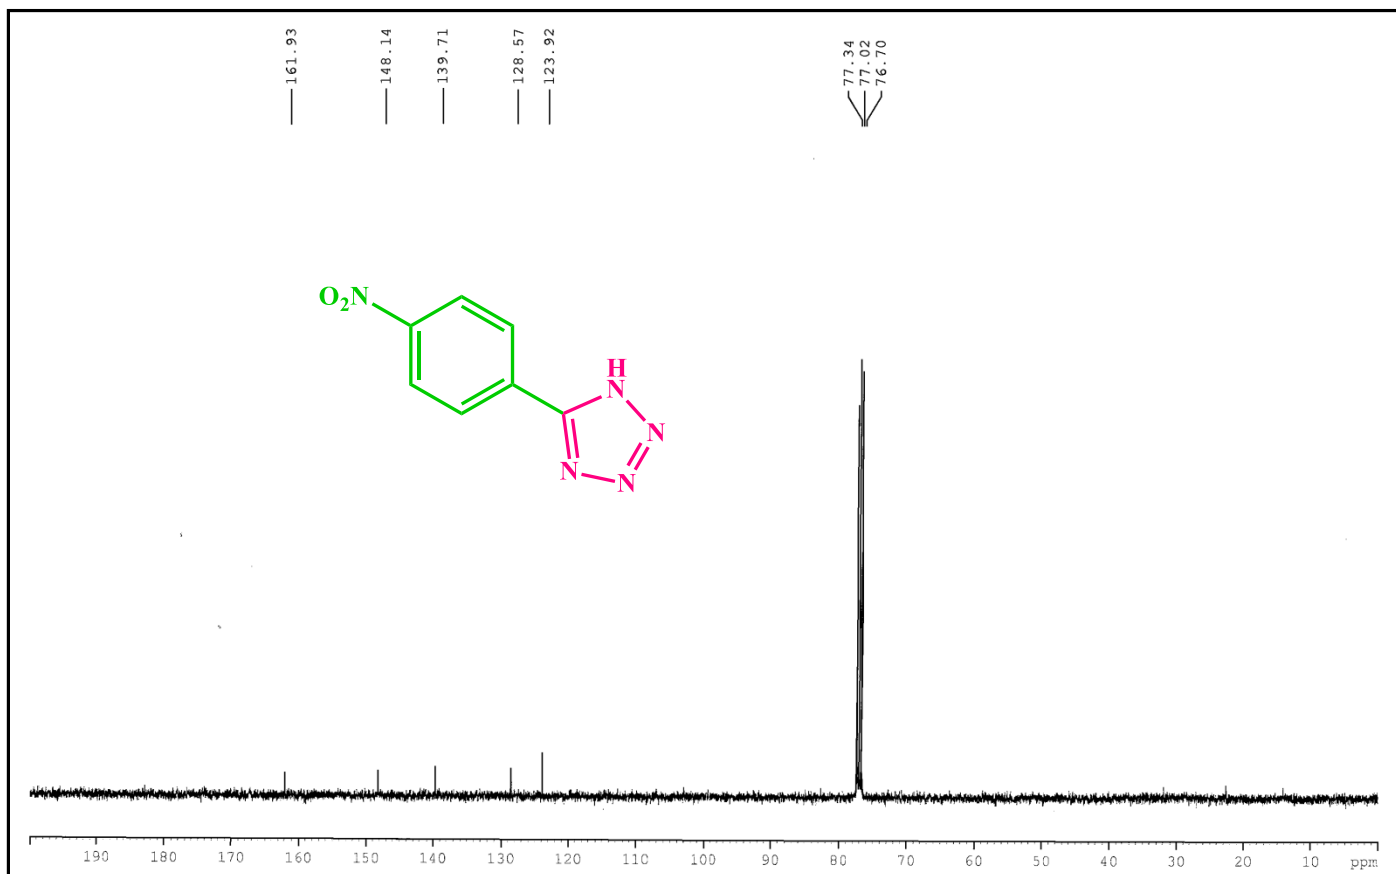

Figure S6.  $^1\text{H}$  and  $^{13}\text{C}$  NMR Spectra of 5-(4-chlorophenyl)-1H-tetrazole (**2f**)

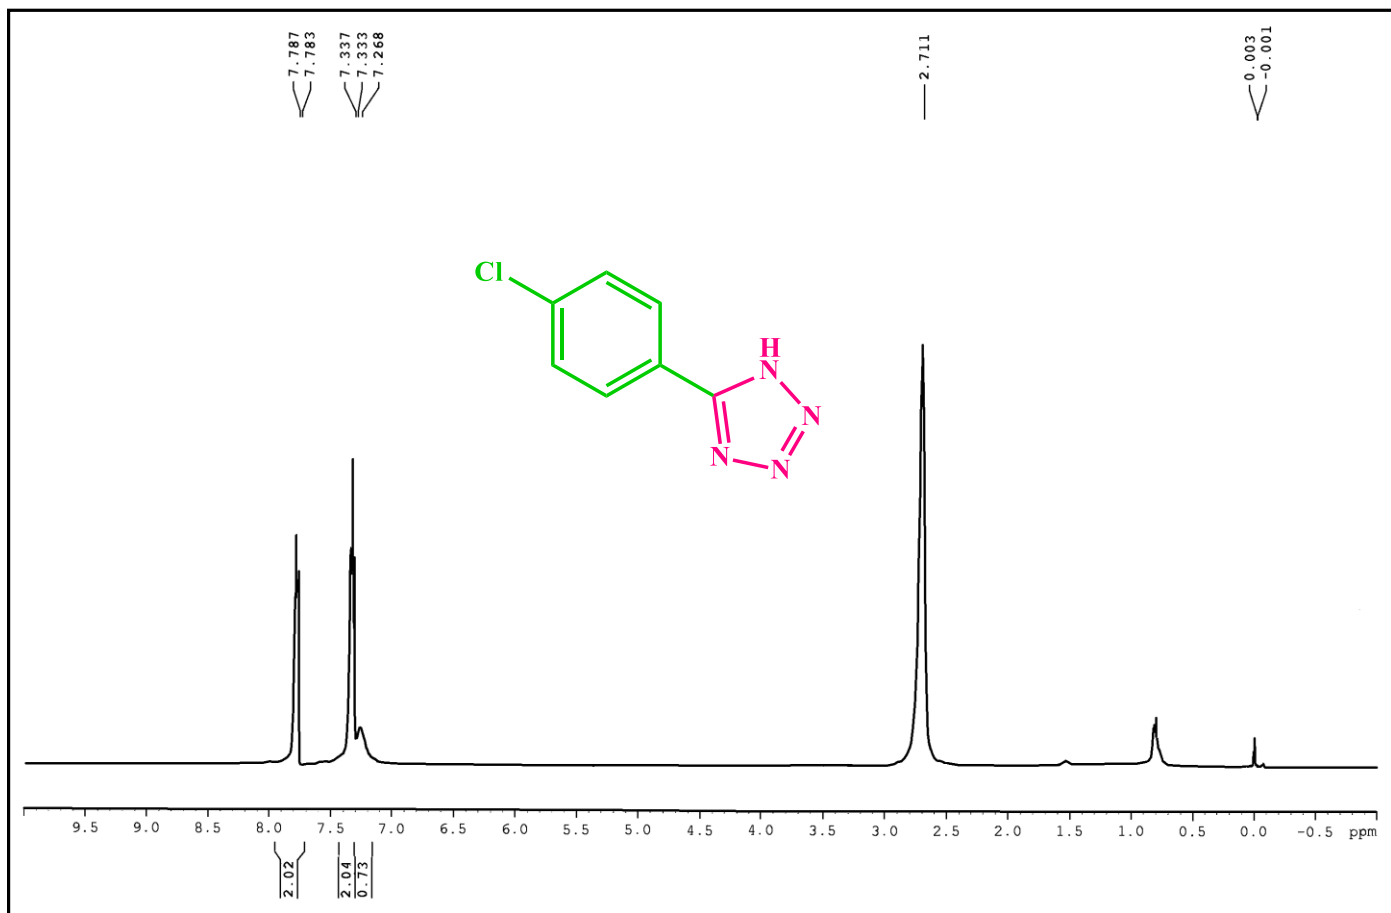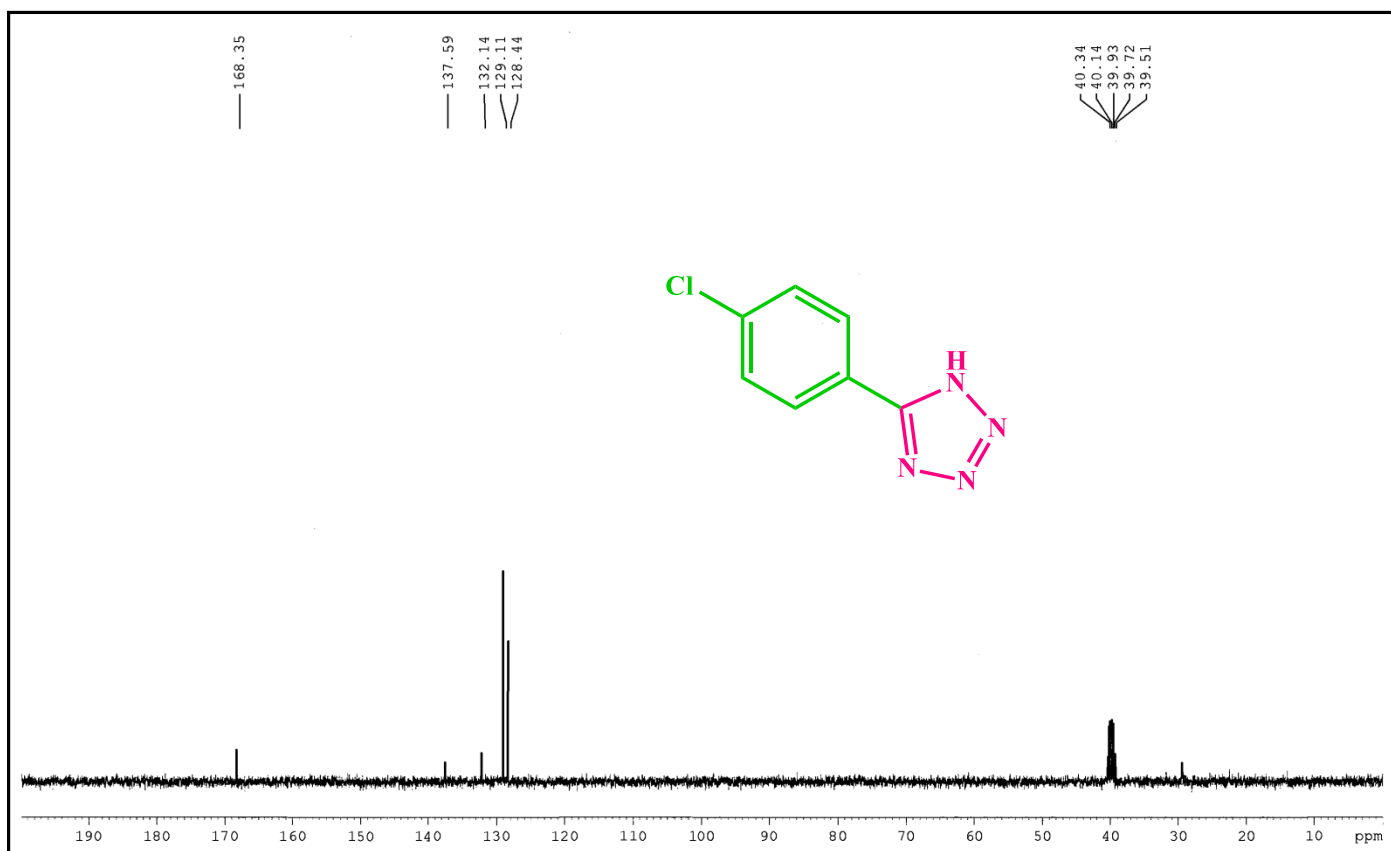

**Figure S7.**  $^1\text{H}$  and  $^{13}\text{C}$  NMR Spectra of 5-(4-bromophenyl)-1*H*-tetrazole (**2h**)

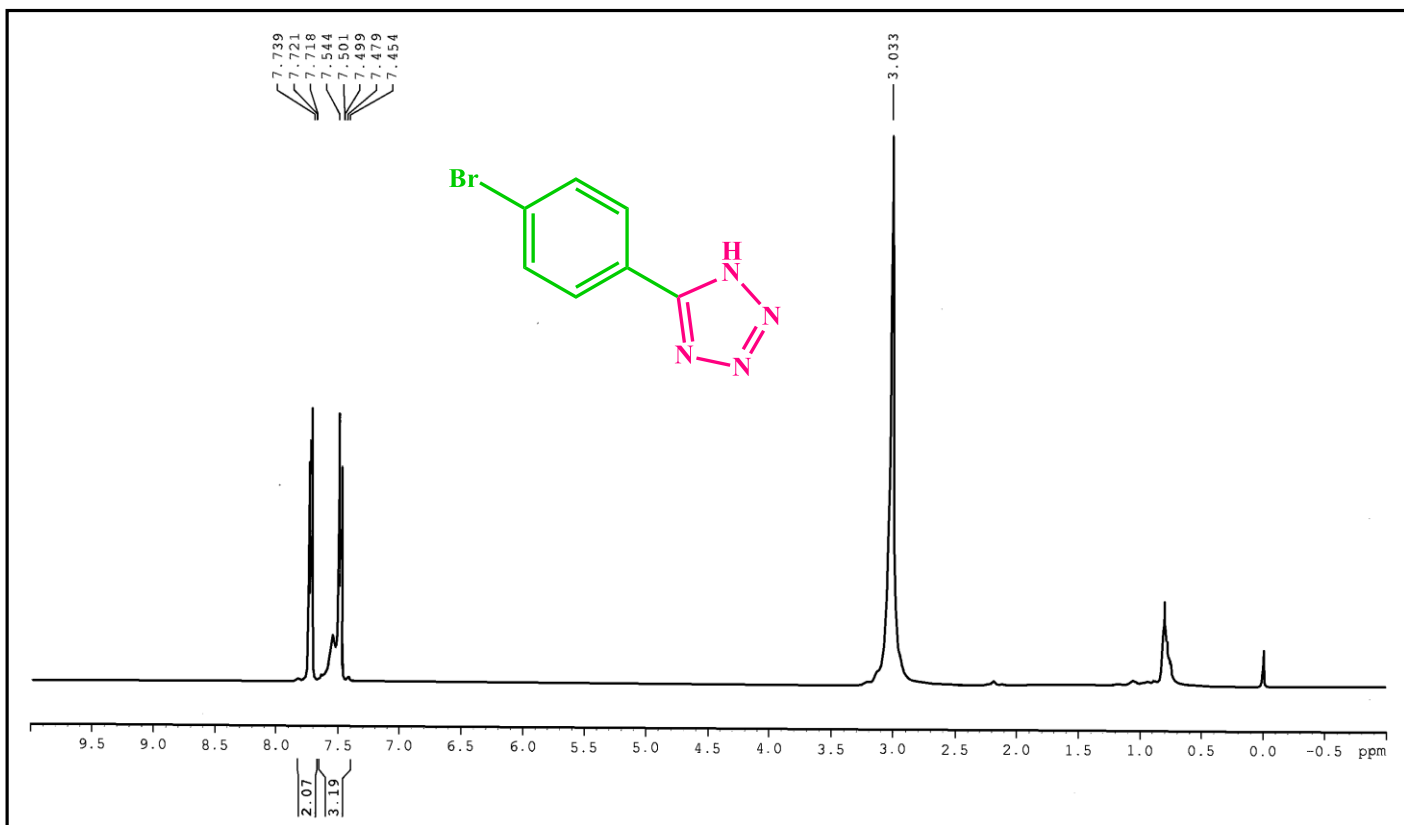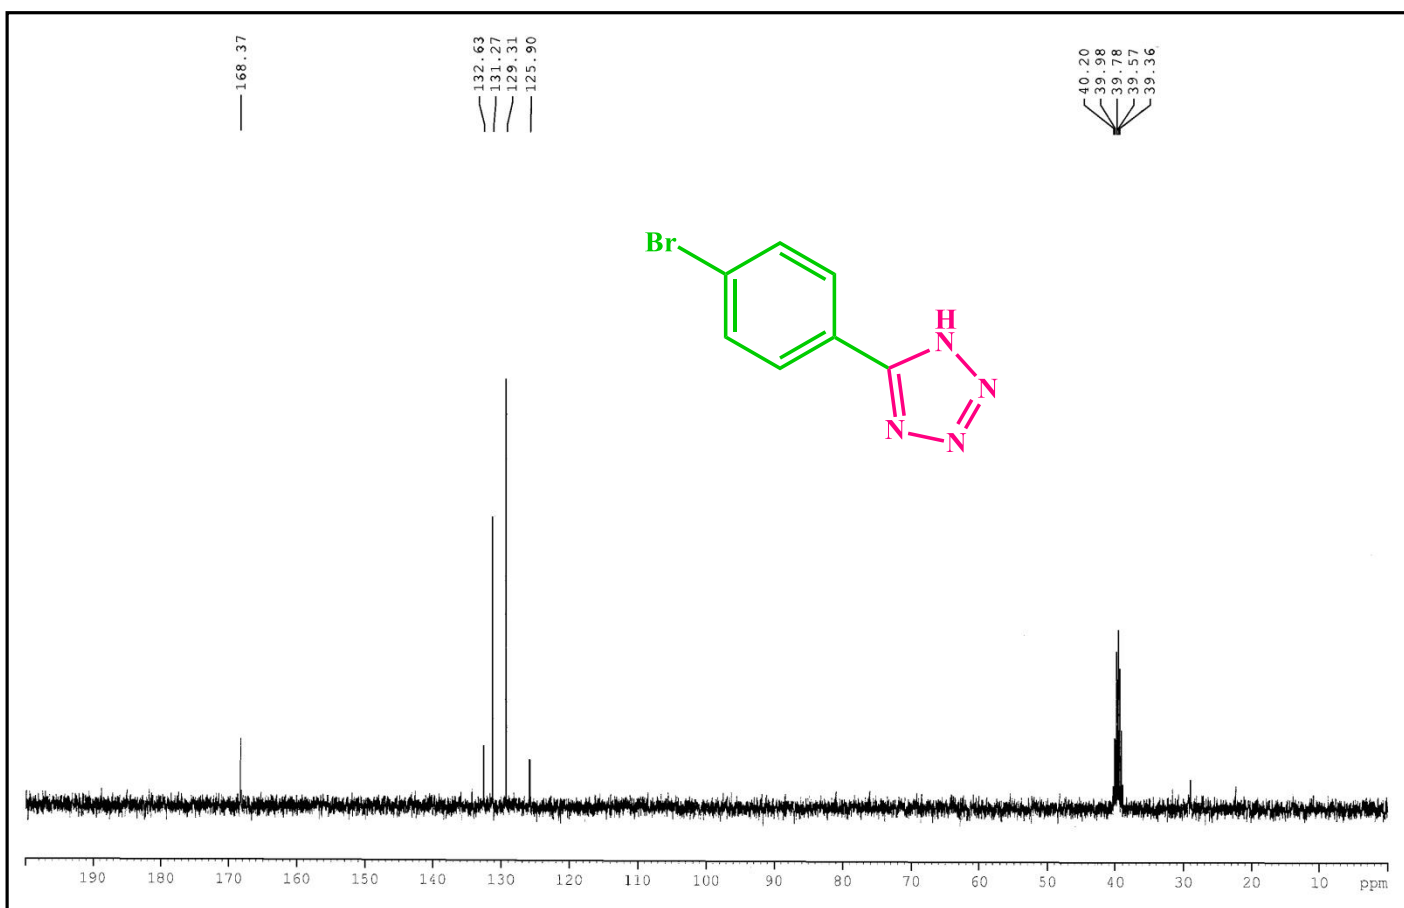

**Figure S8.**  $^1\text{H}$  and  $^{13}\text{C}$  NMR Spectra of 5-(3,4-dimethoxyphenyl)-1*H*-tetrazole (**2i**)

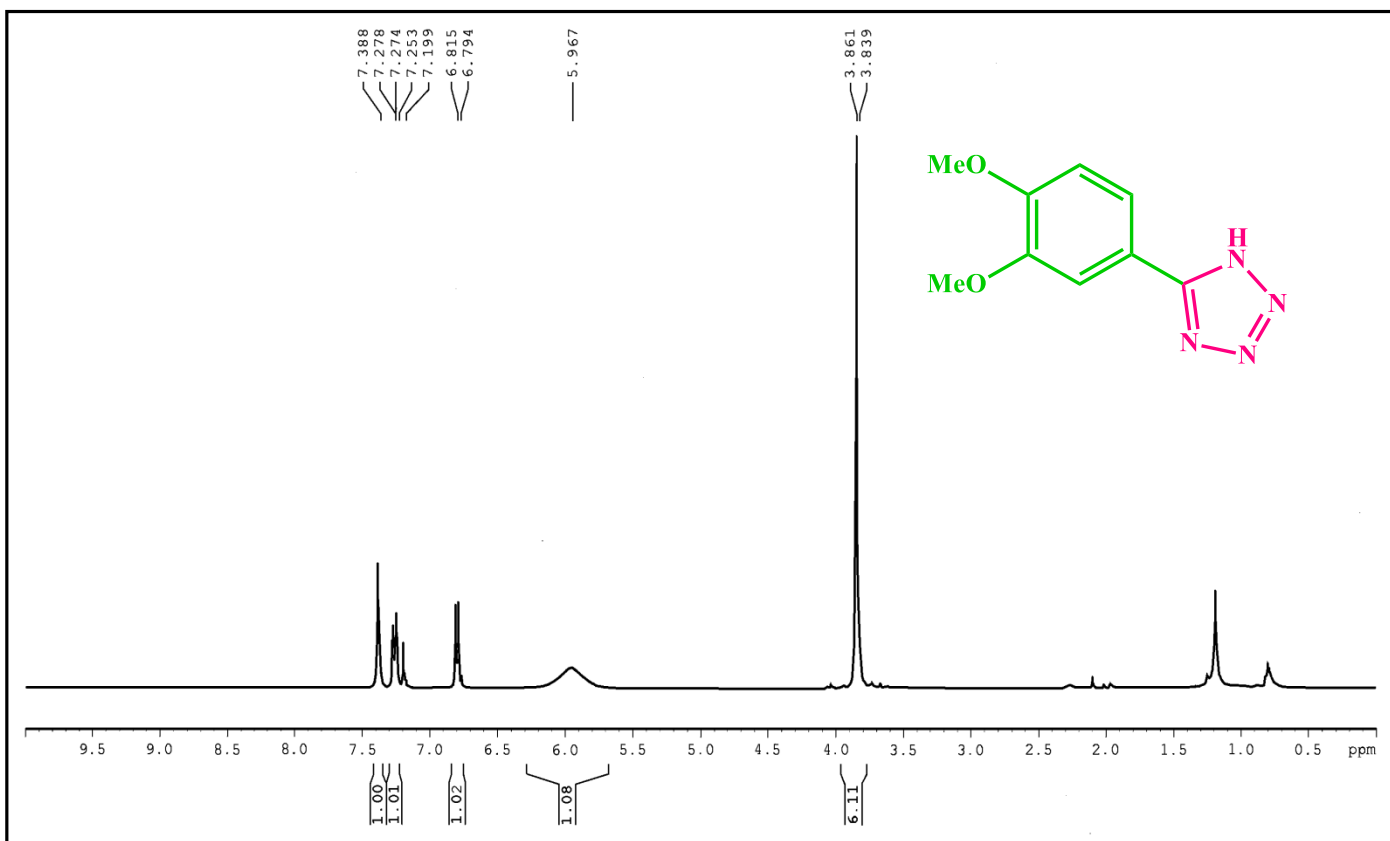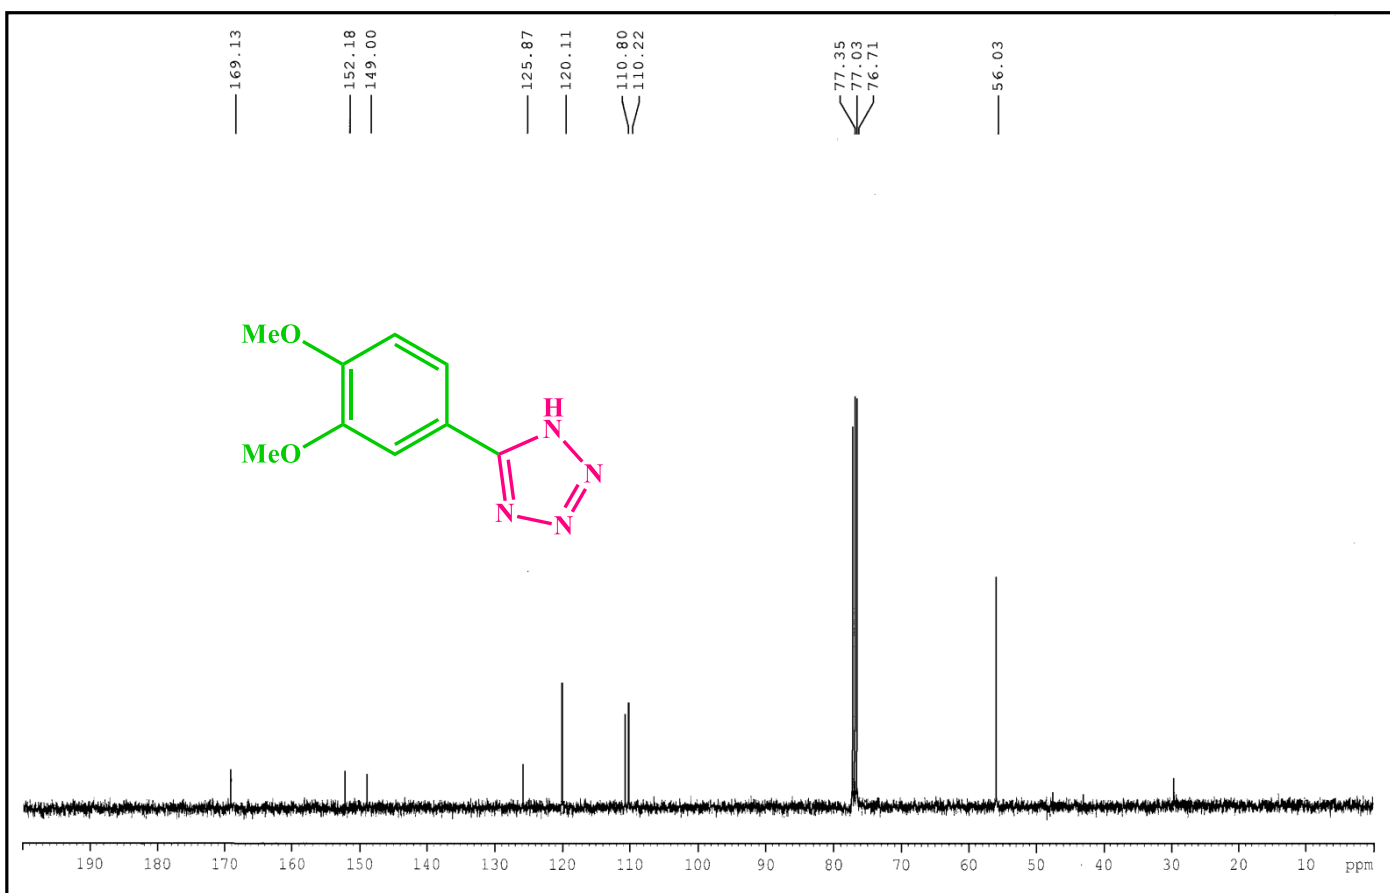

**Figure S9.**  $^1\text{H}$  and  $^{13}\text{C}$  NMR Spectra of 5-(4-methoxyphenyl)-1*H*-tetrazole (**2j**)

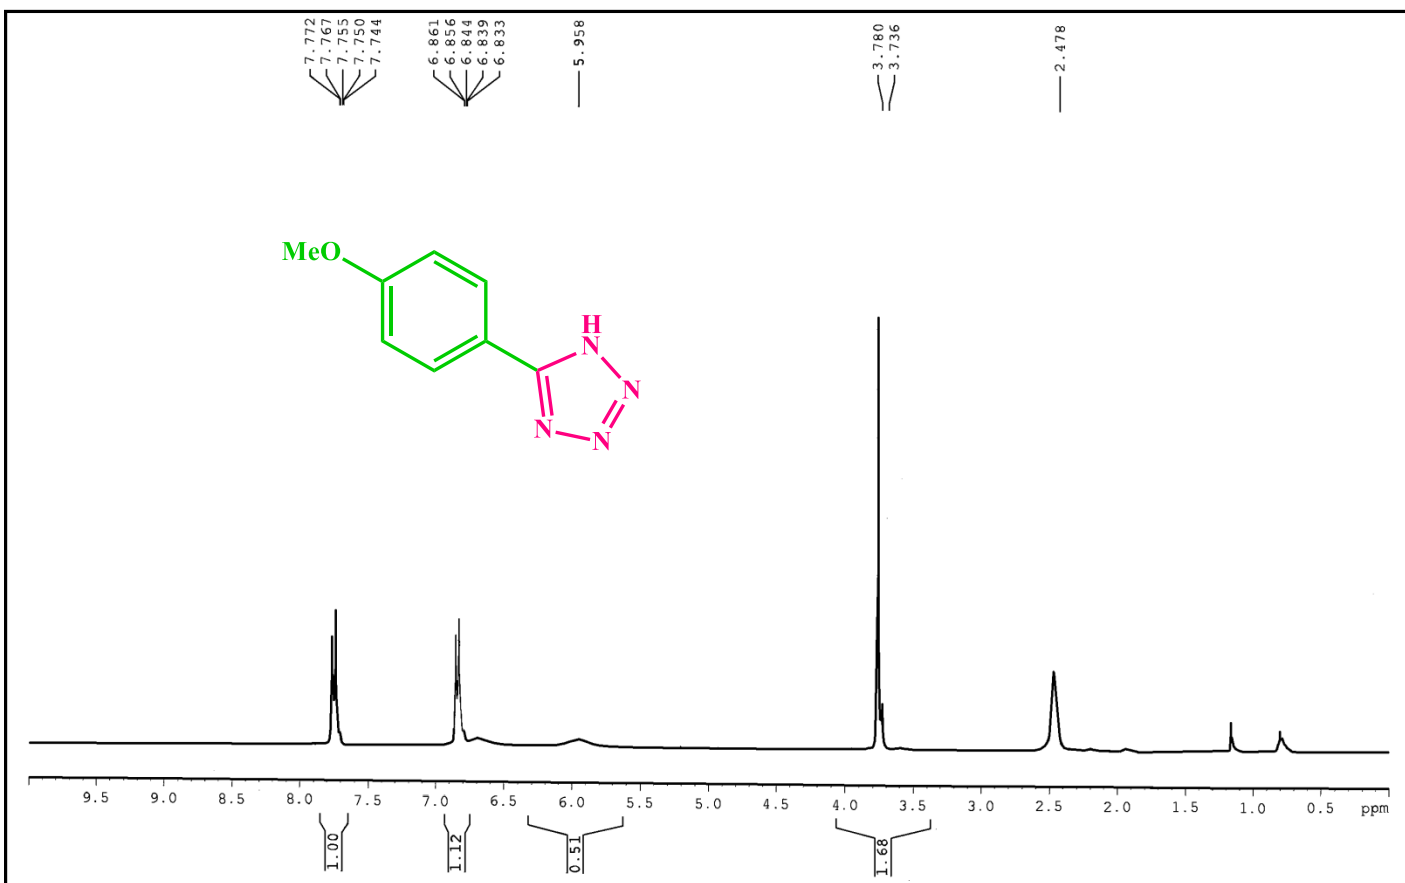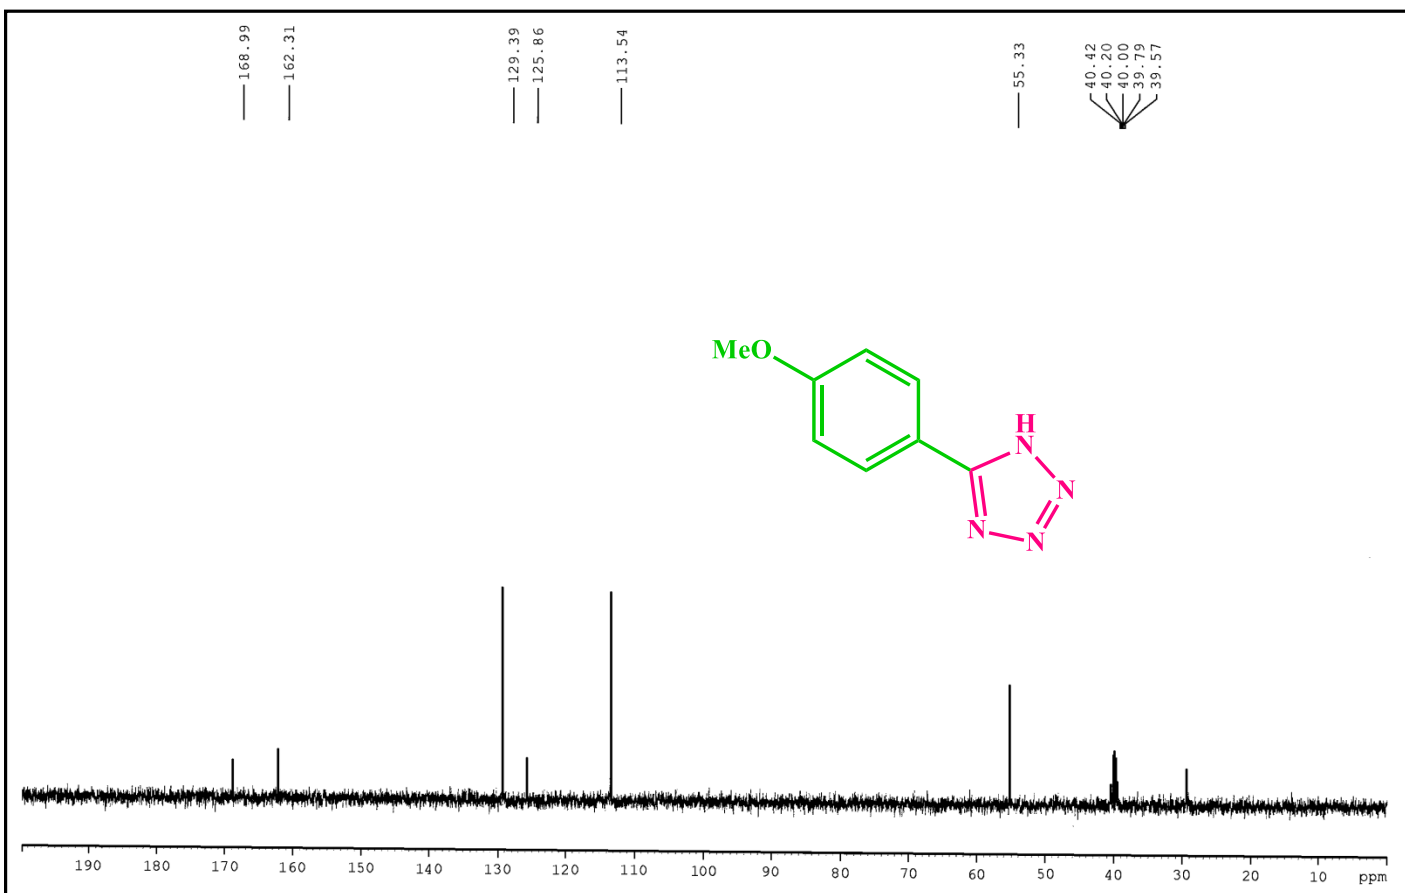

Figure S10.  $^1\text{H}$  and  $^{13}\text{C}$  NMR Spectra of 2-(1*H*-tetrazol-5-yl)phenol (**2k**)

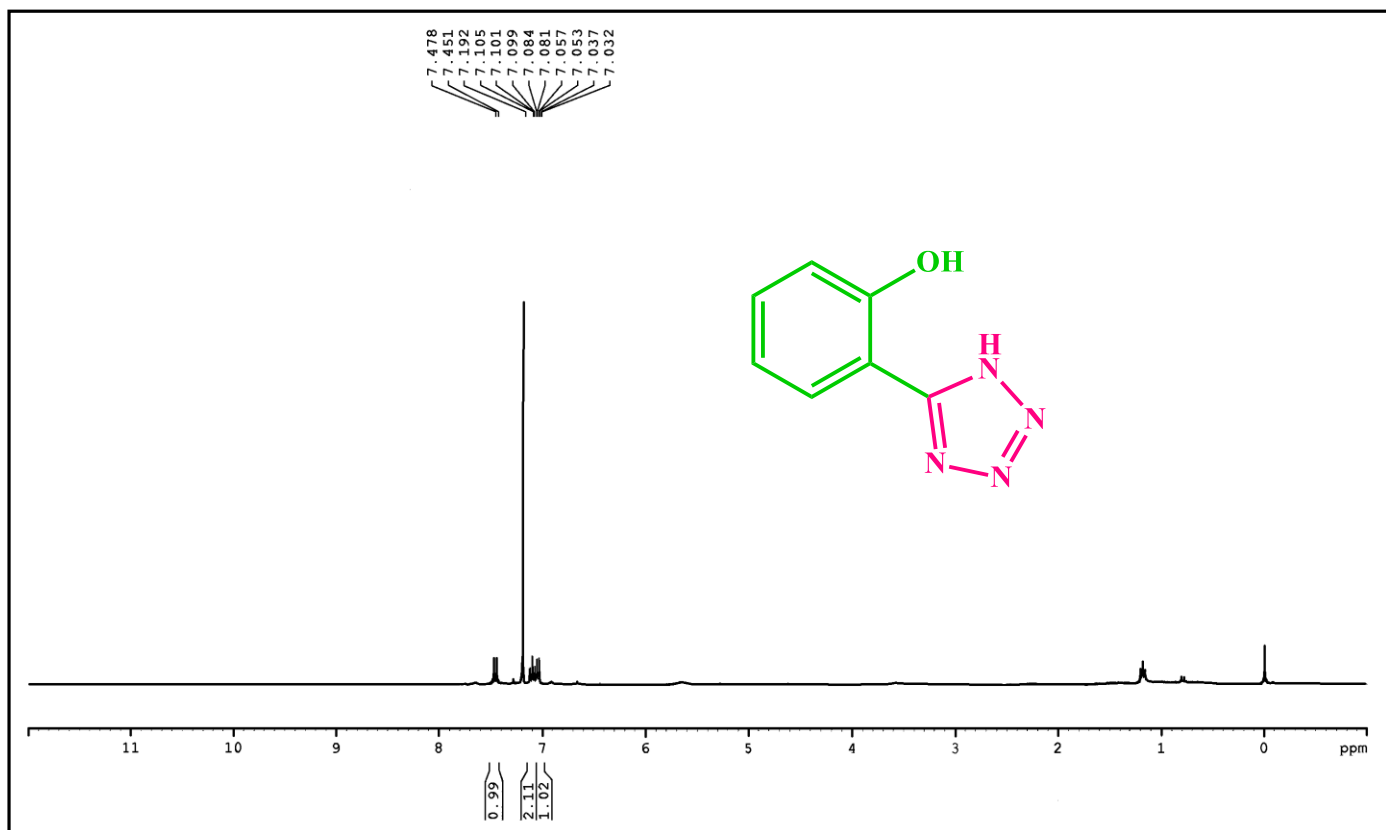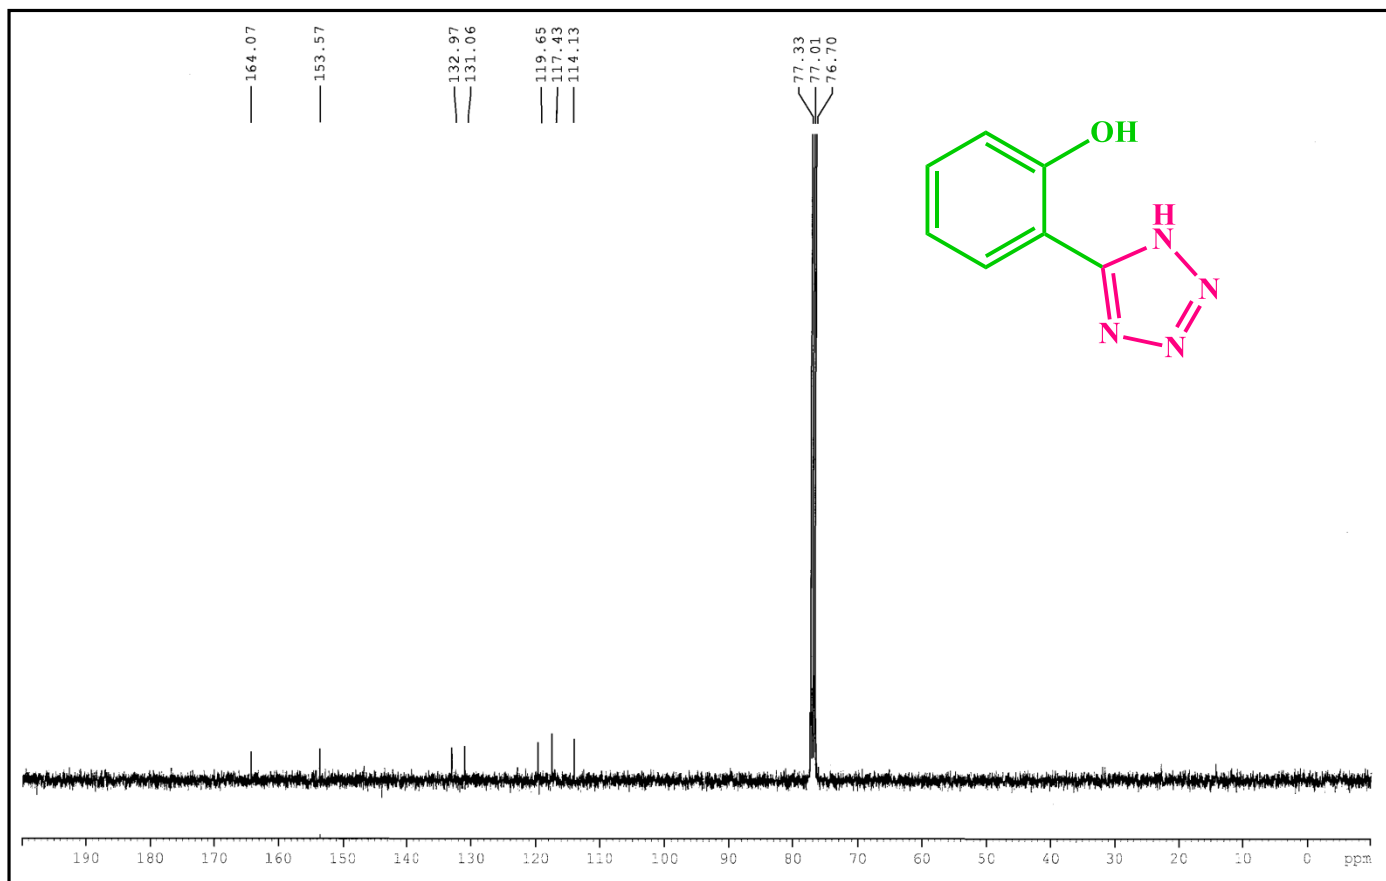

**Figure S11.**  $^1\text{H}$  and  $^{13}\text{C}$  NMR Spectra of 4-(1*H*-tetrazol-5-yl)phenol (**21**)

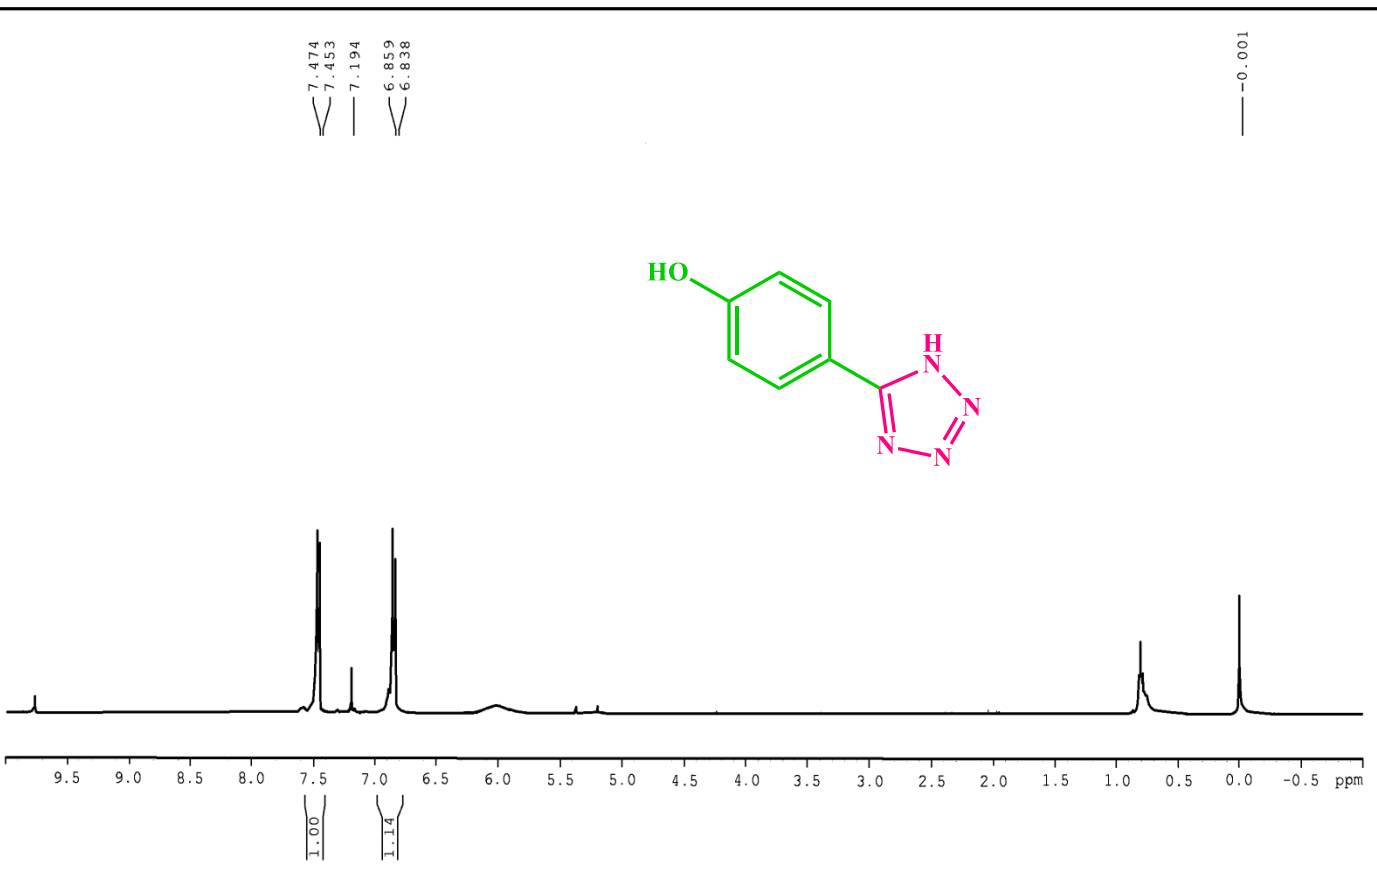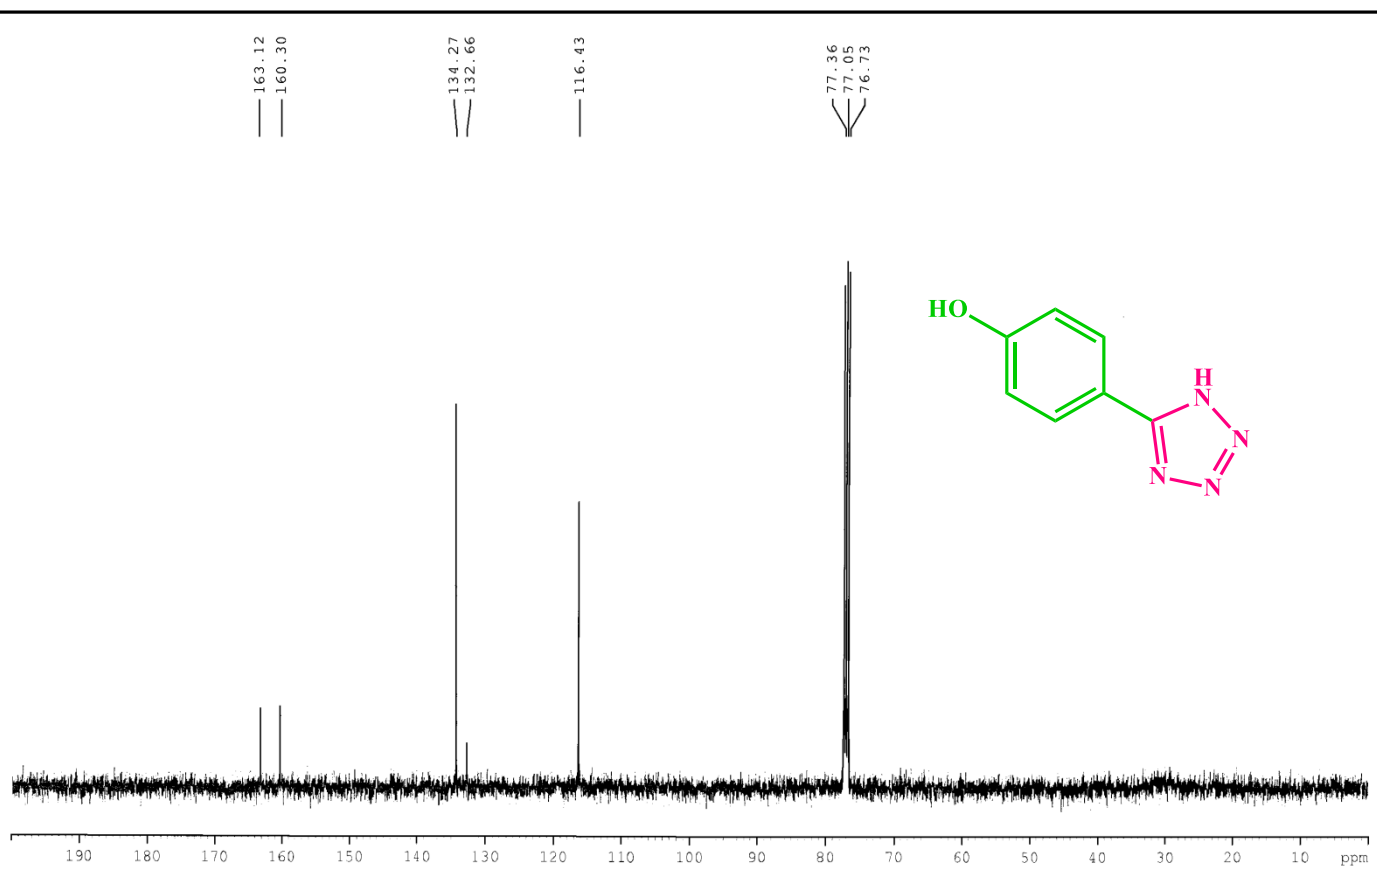



**Figure S12.**  $^1\text{H}$  and  $^{13}\text{C}$  NMR Spectra of 5-methyl-2-(1*H*-tetrazol-5-yl)phenol (**2m**)

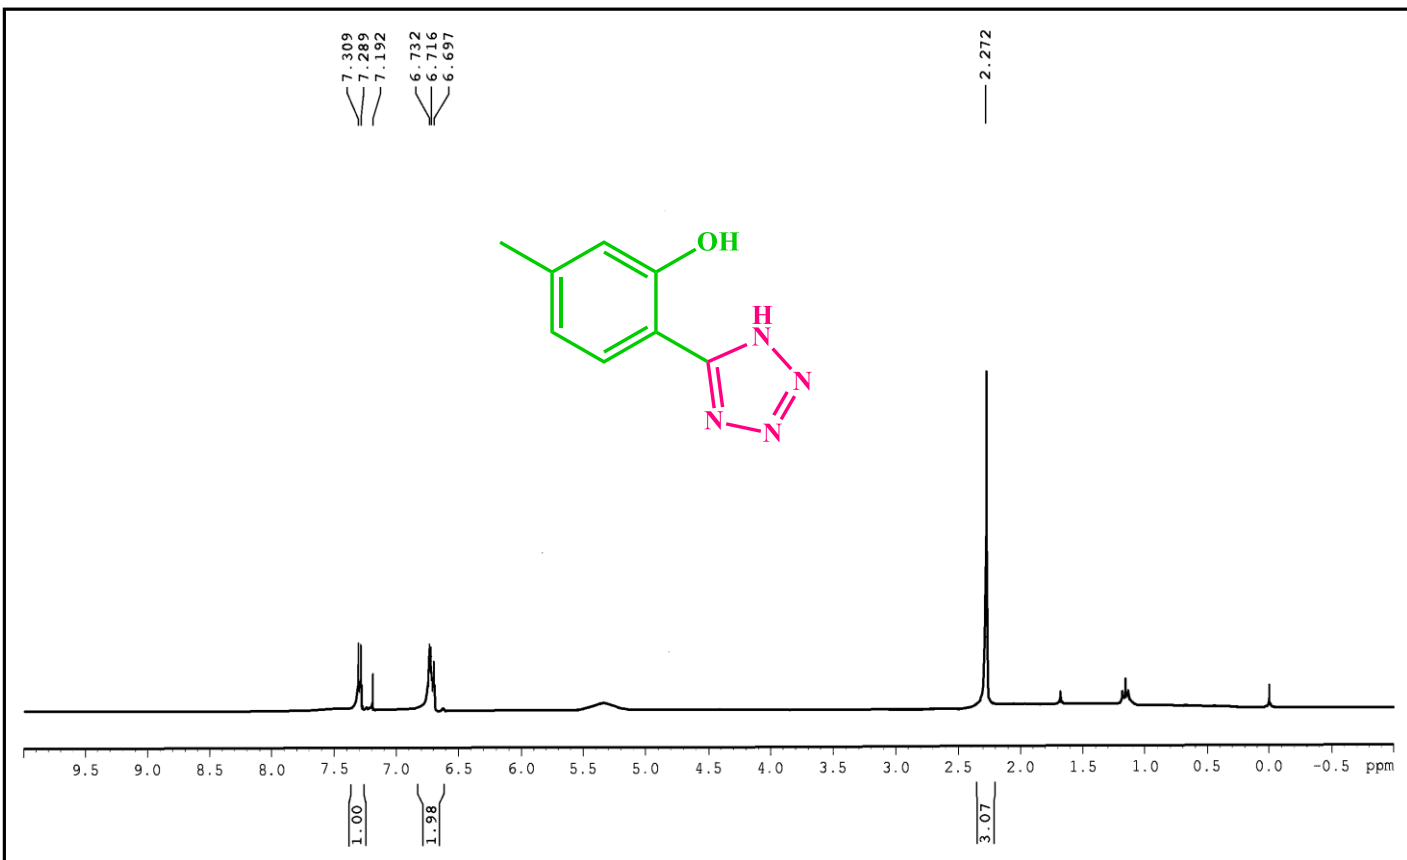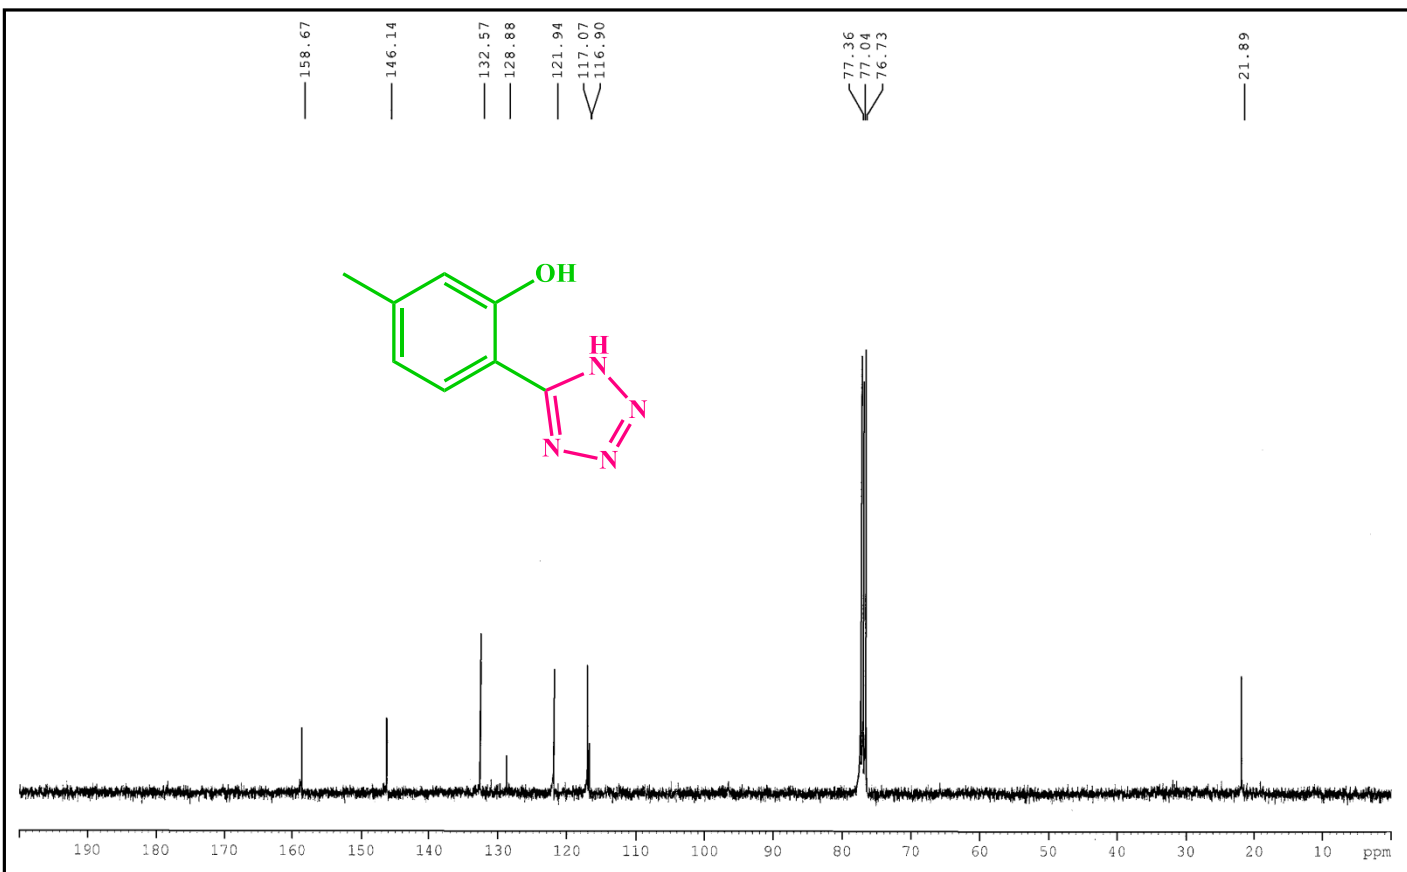

**Figure S13.**  $^1\text{H}$  and  $^{13}\text{C}$  NMR Spectra of 5-(furan-2-yl)-1*H*-tetrazole (**3a**)

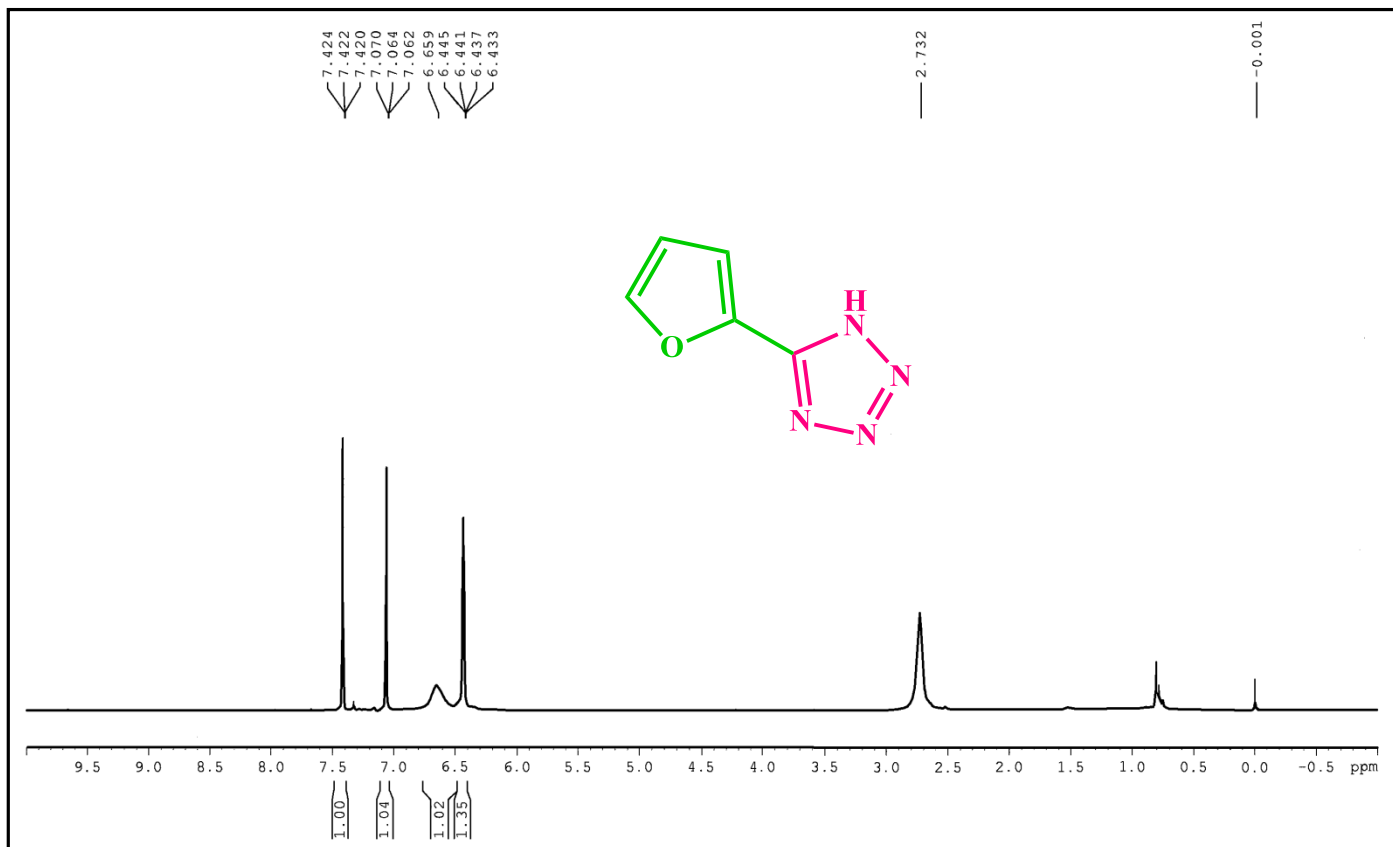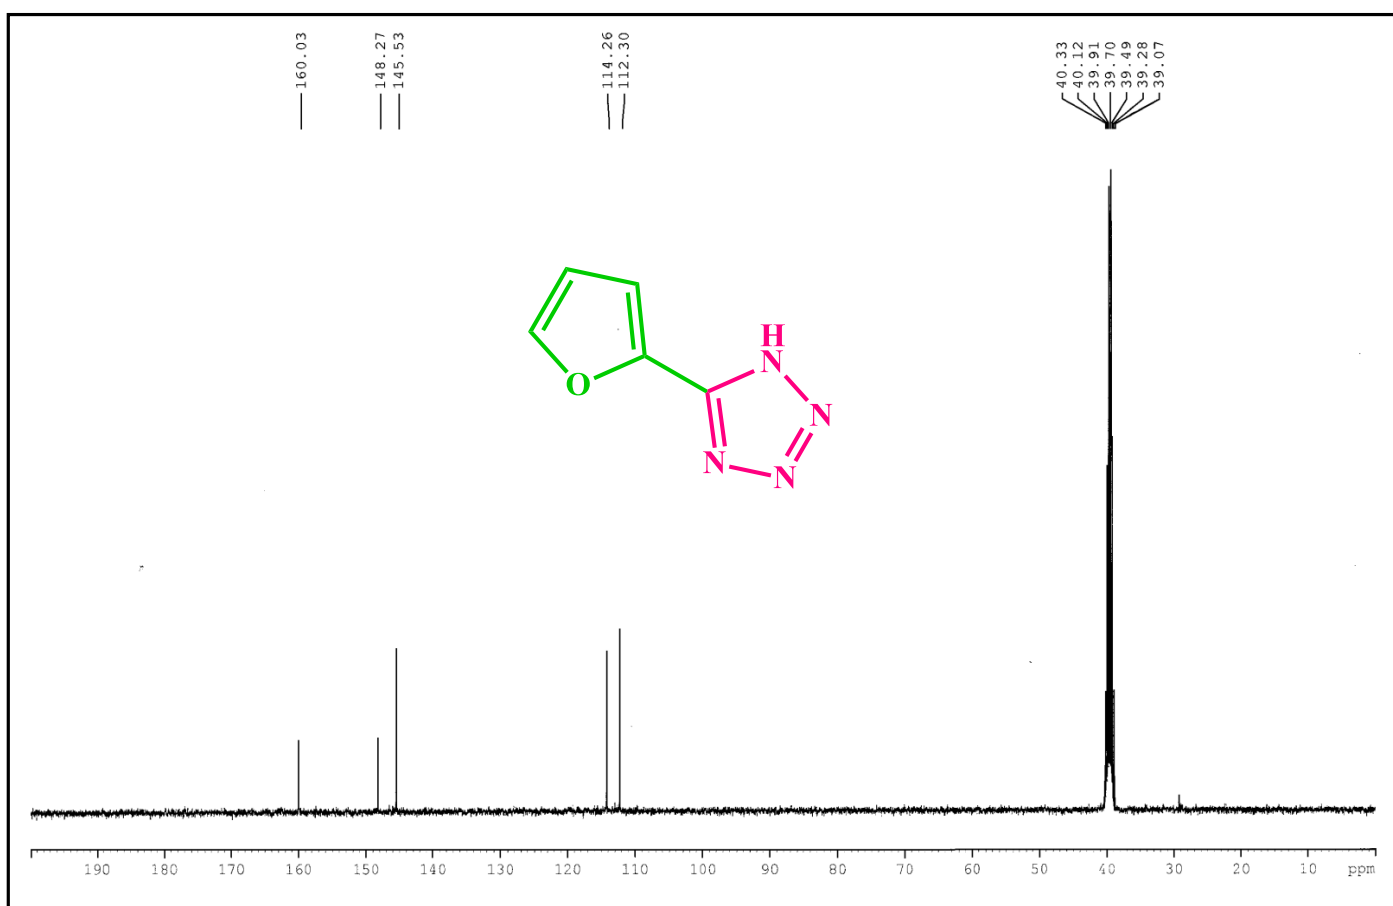

Figure S14.  $^1\text{H}$  and  $^{13}\text{C}$  NMR Spectra of 5-(thiophen-2-yl)-1H-tetrazole (**3b**)

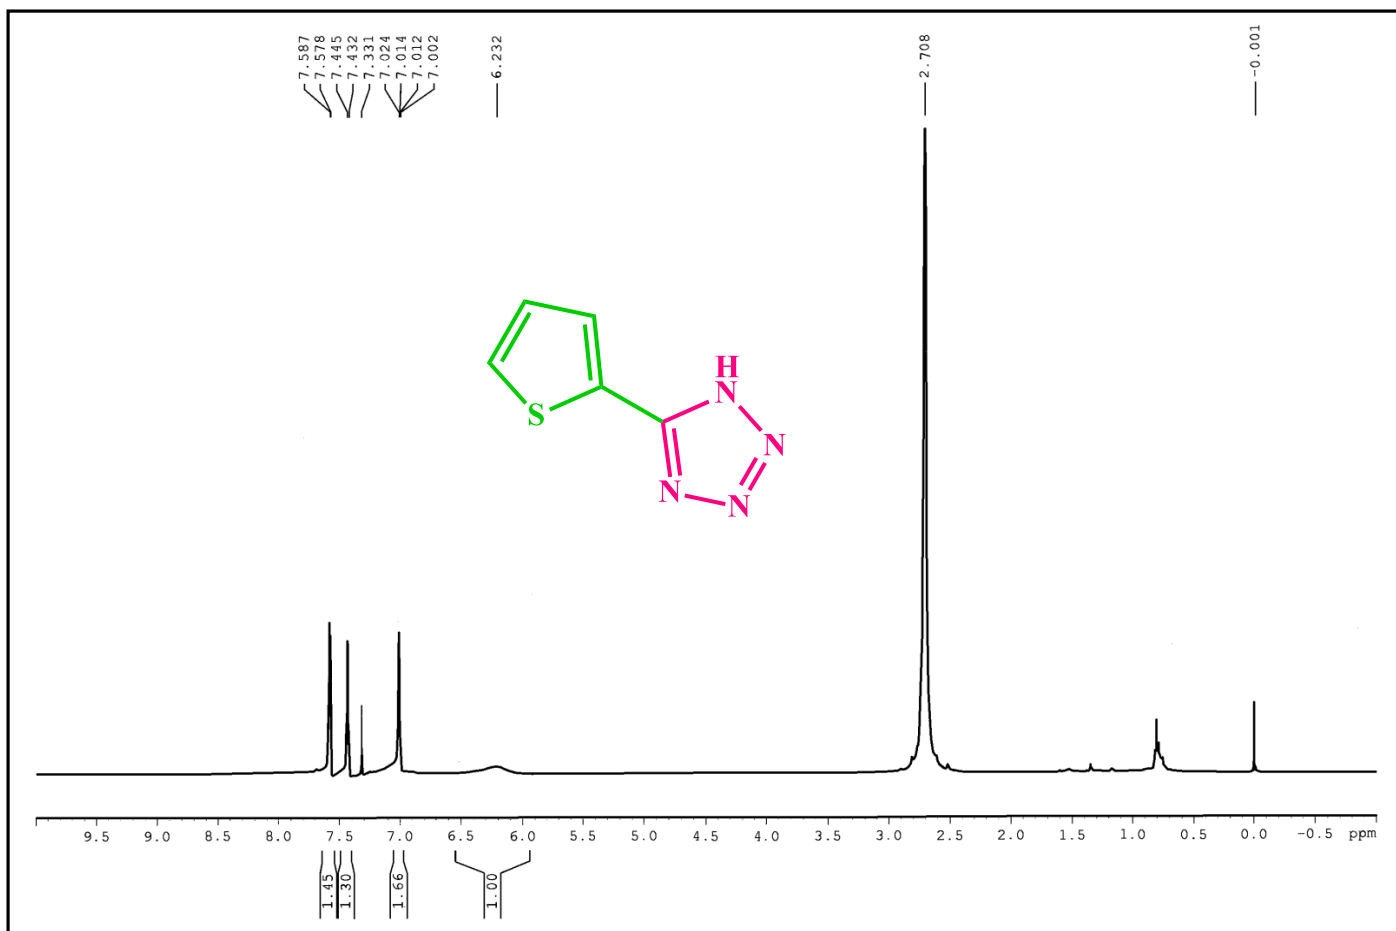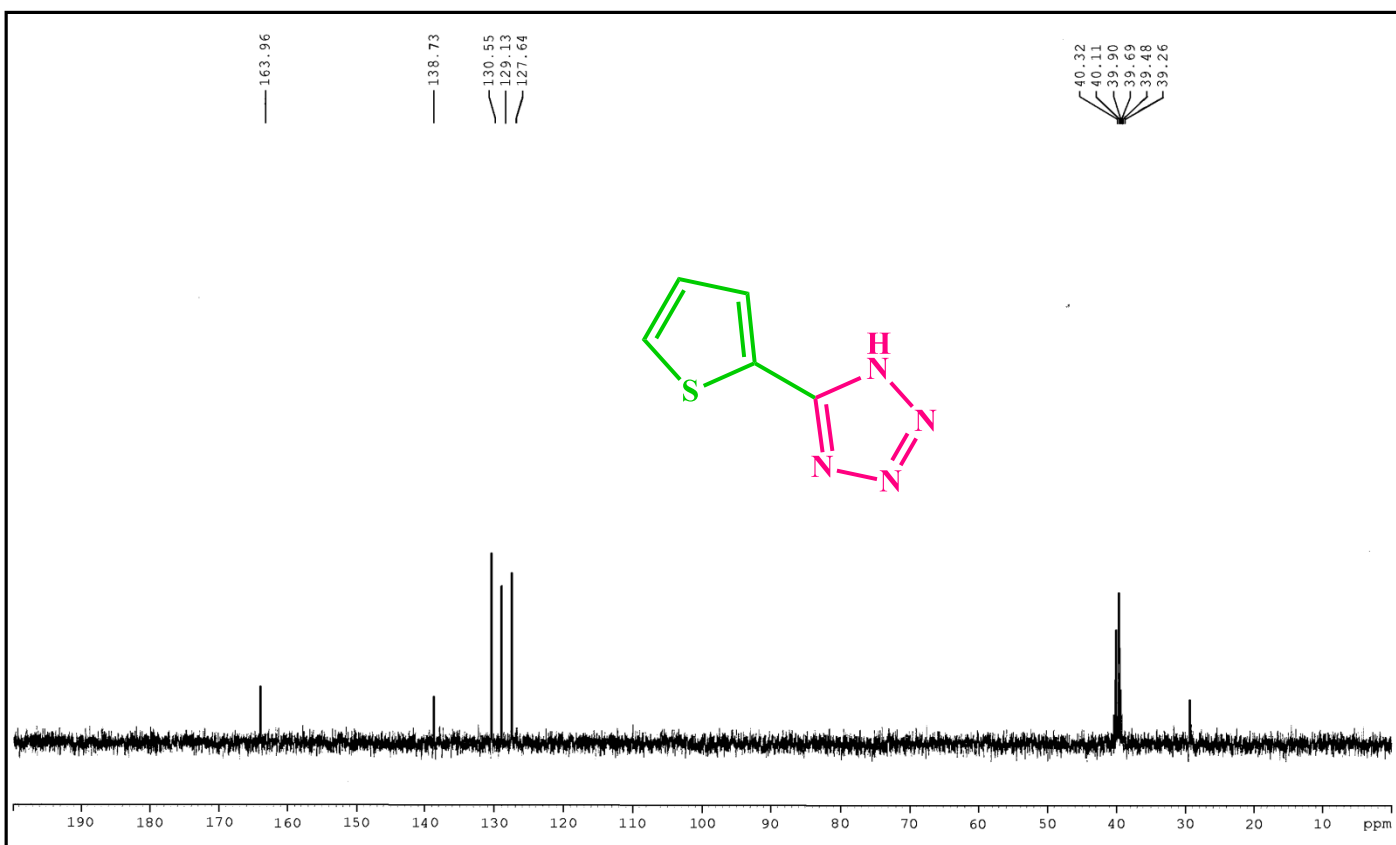

**Figure S15.**  $^1\text{H}$  and  $^{13}\text{C}$  NMR Spectra of 2-(1*H*-tetrazol-5-yl)pyridine (**3c**)

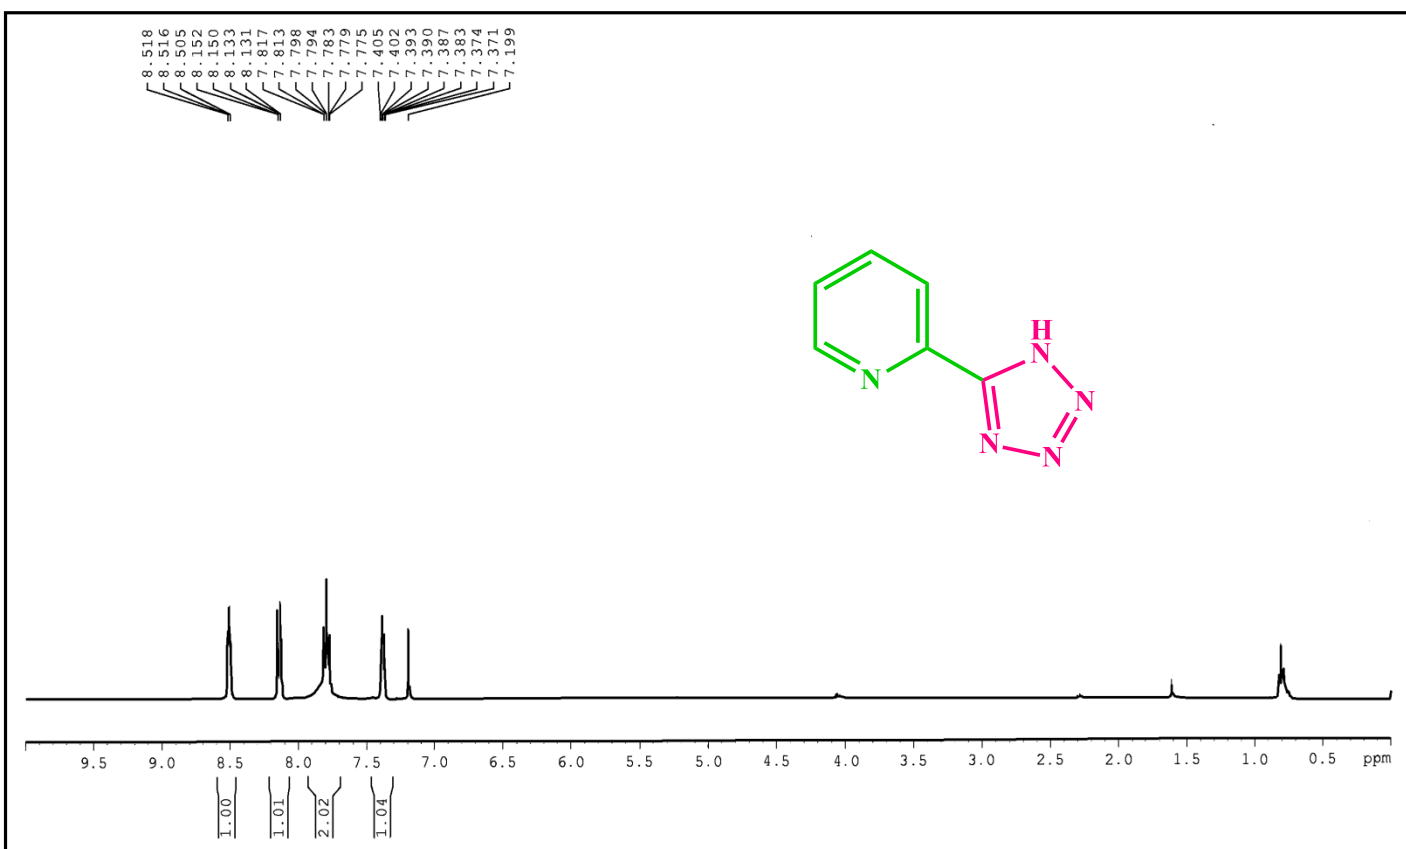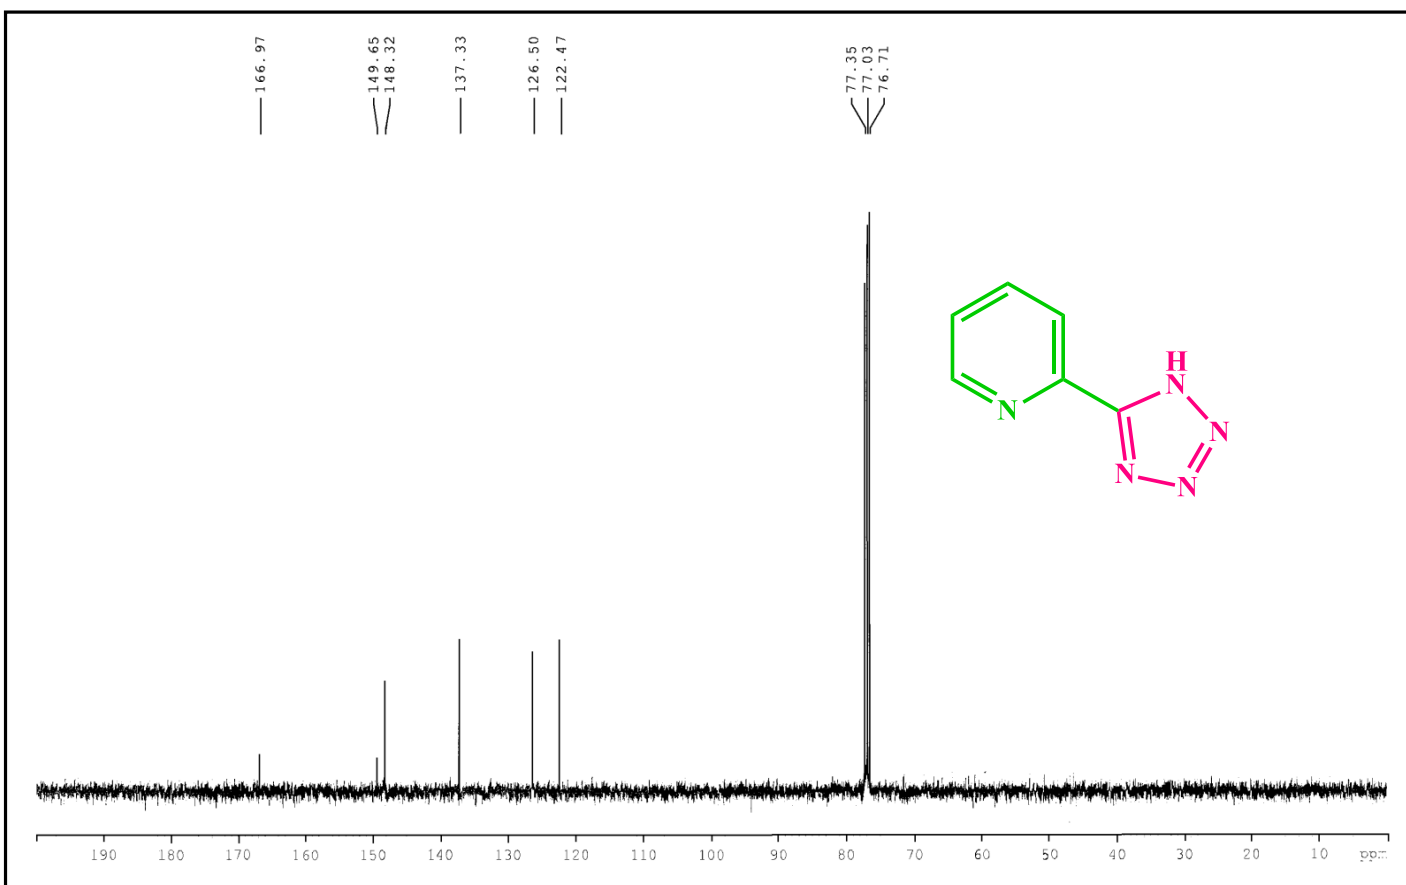

**Figure S16.**  $^1\text{H}$  and  $^{13}\text{C}$  NMR Spectra of 2-(1*H*-tetrazol-5-yl)quinoline (**3d**)

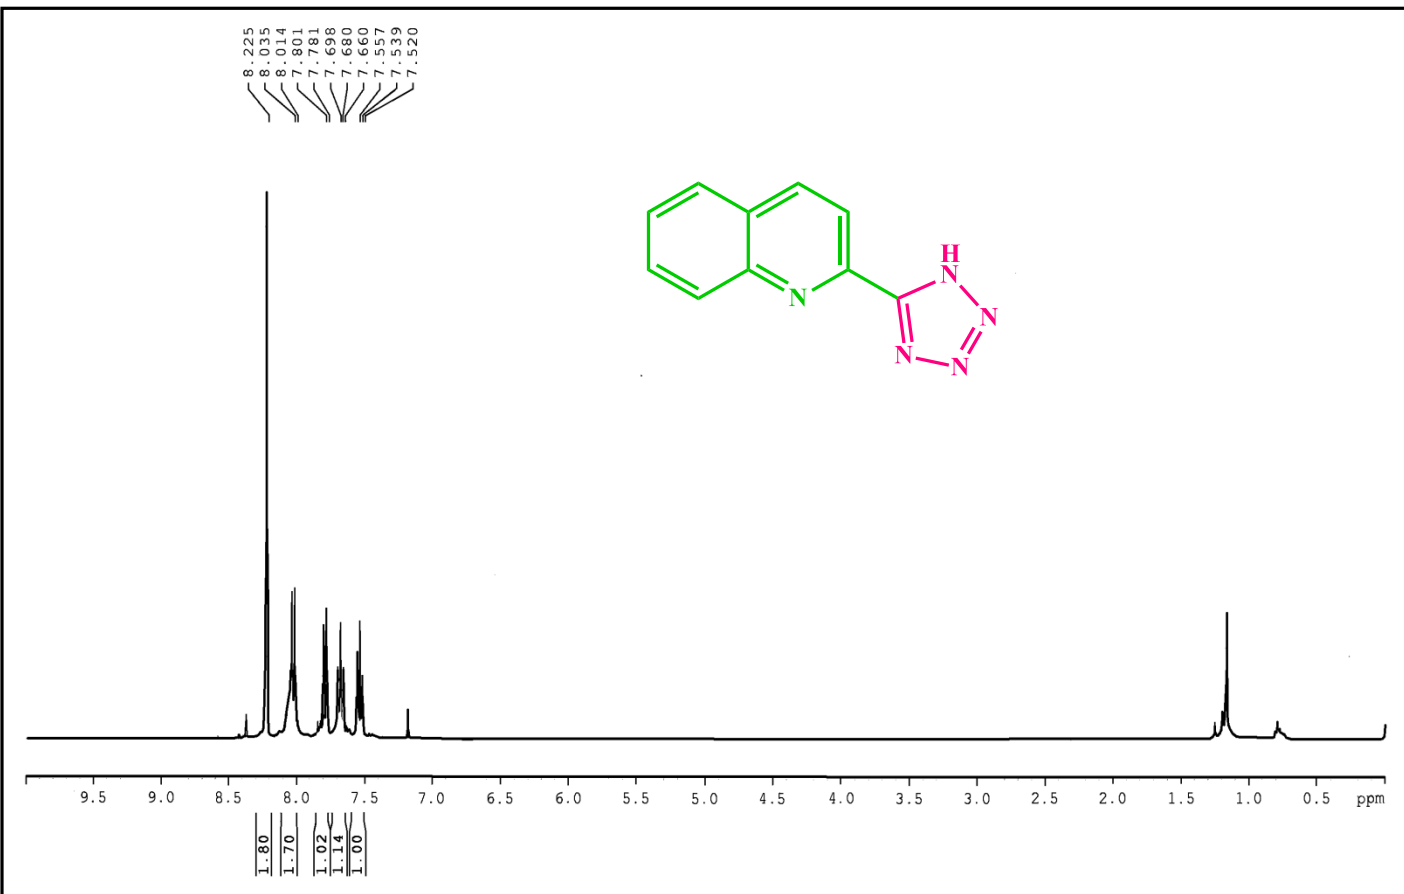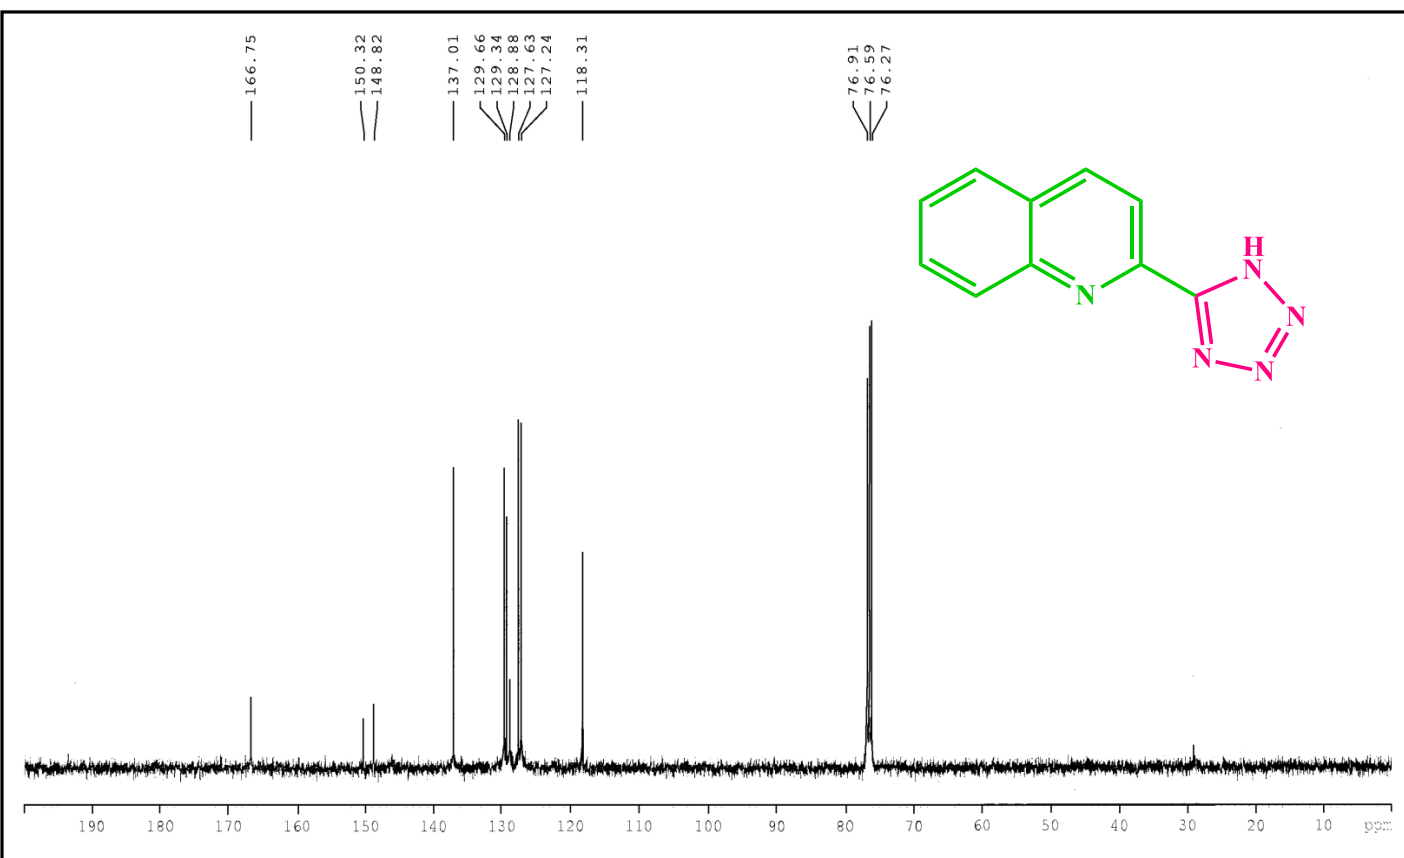

Figure S17.  $^1\text{H}$  and  $^{13}\text{C}$  NMR Spectra of 1H-tetrazole (4a)

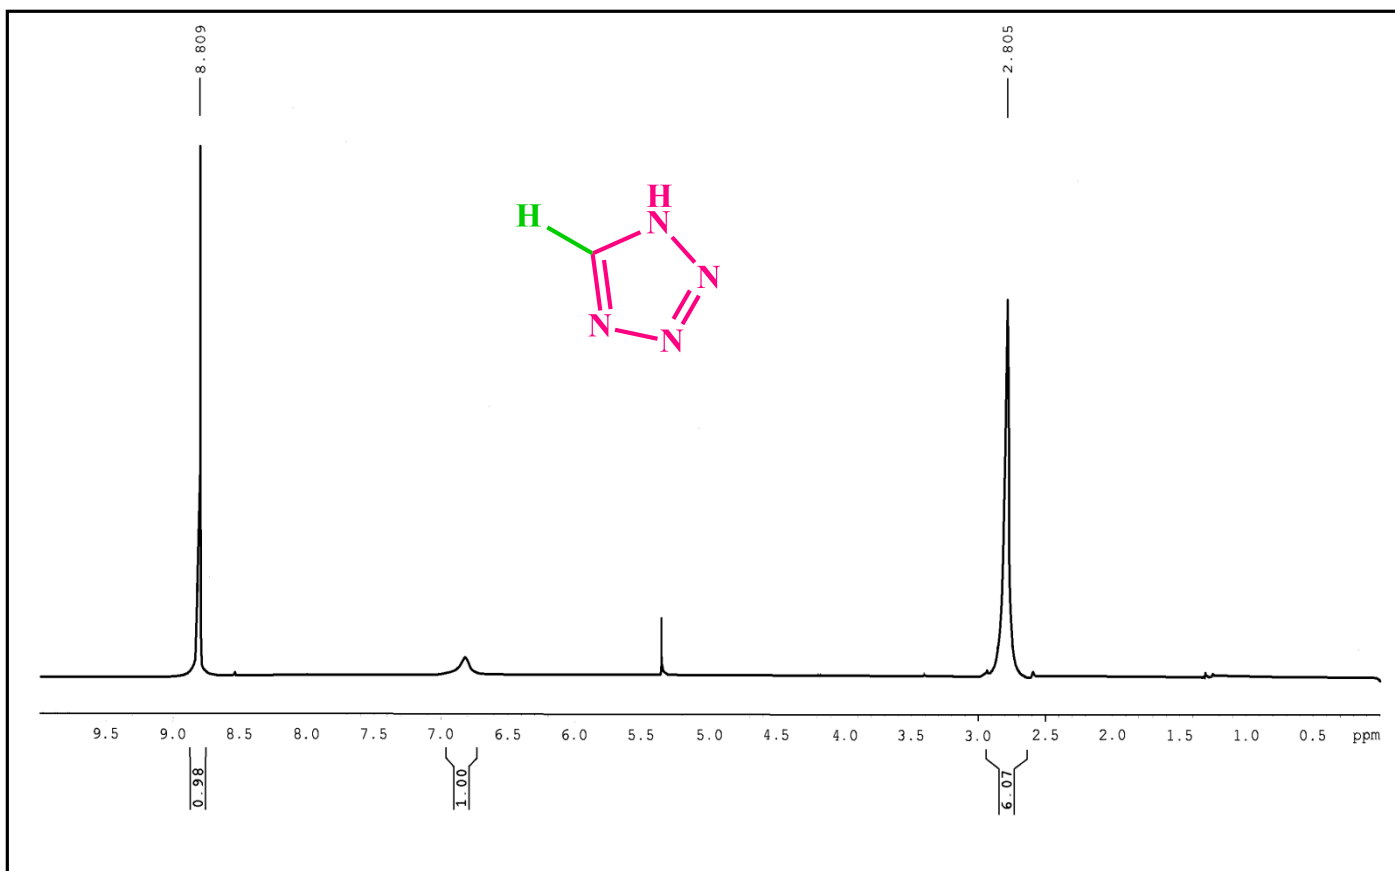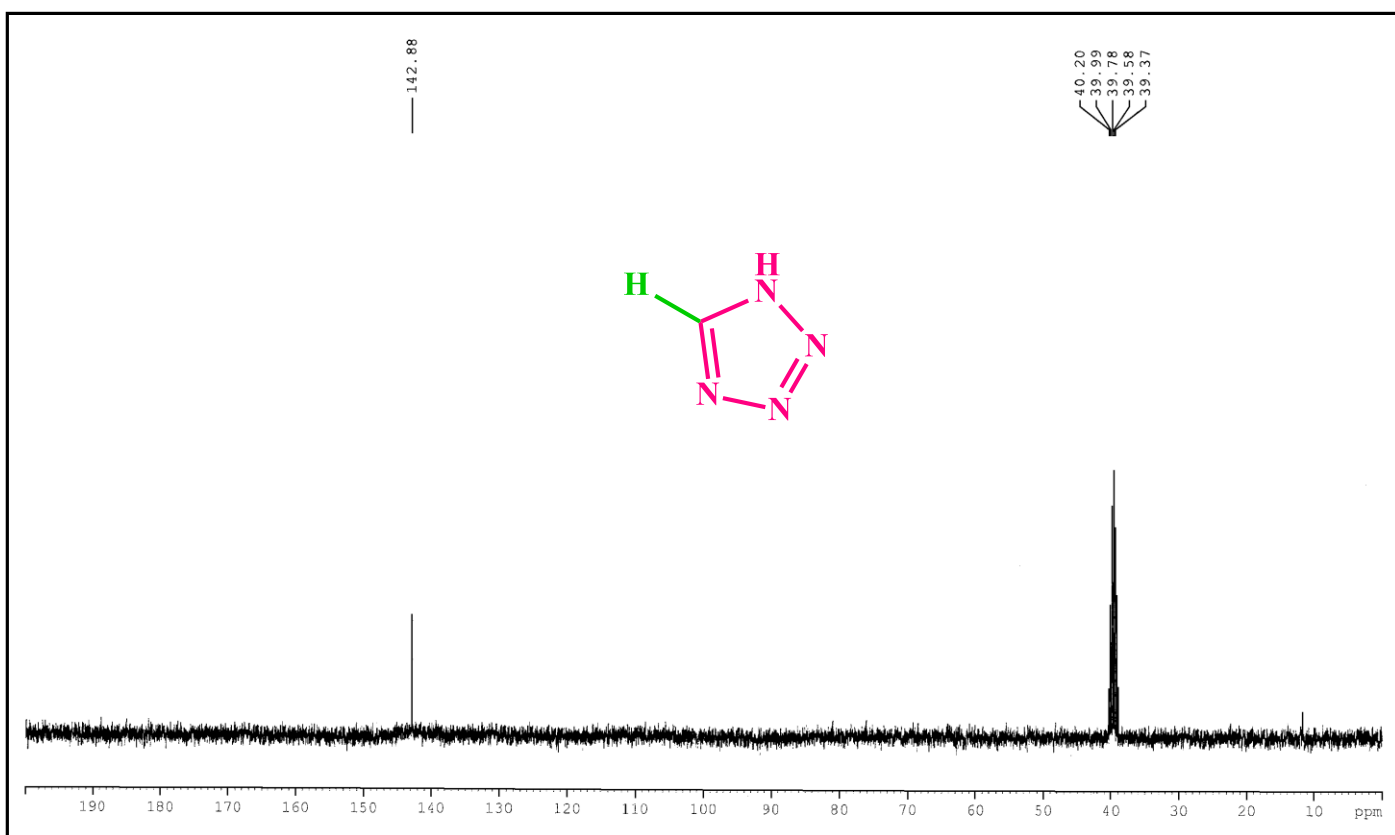

Figure S18. <sup>1</sup>H and <sup>13</sup>C NMR Spectra of 1*H*-tetrazole (4a)

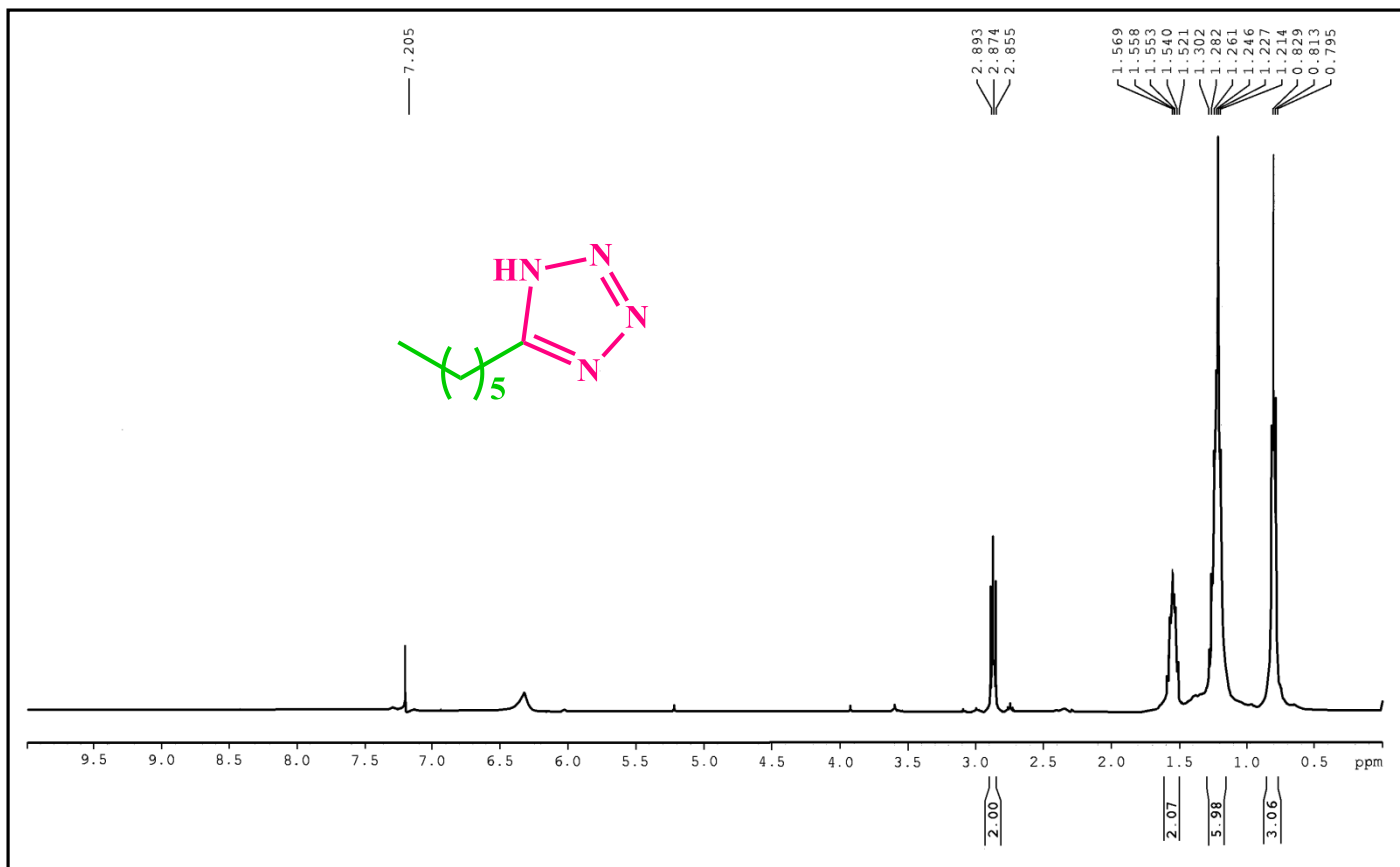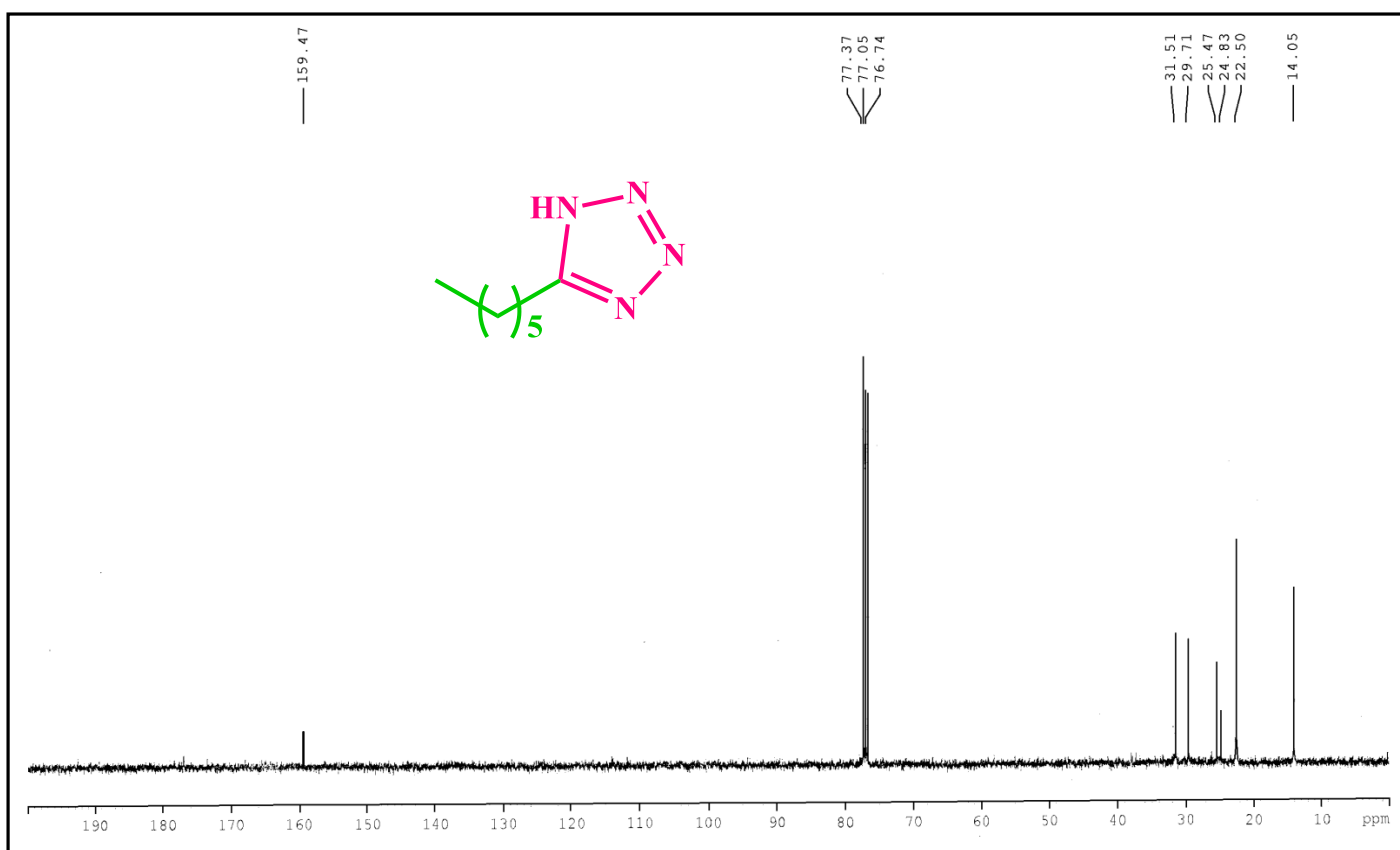

**Figure S19.**  $^1\text{H}$  and  $^{13}\text{C}$  NMR Spectra of (E)-5-styryl-1H-tetrazole (**4c**)

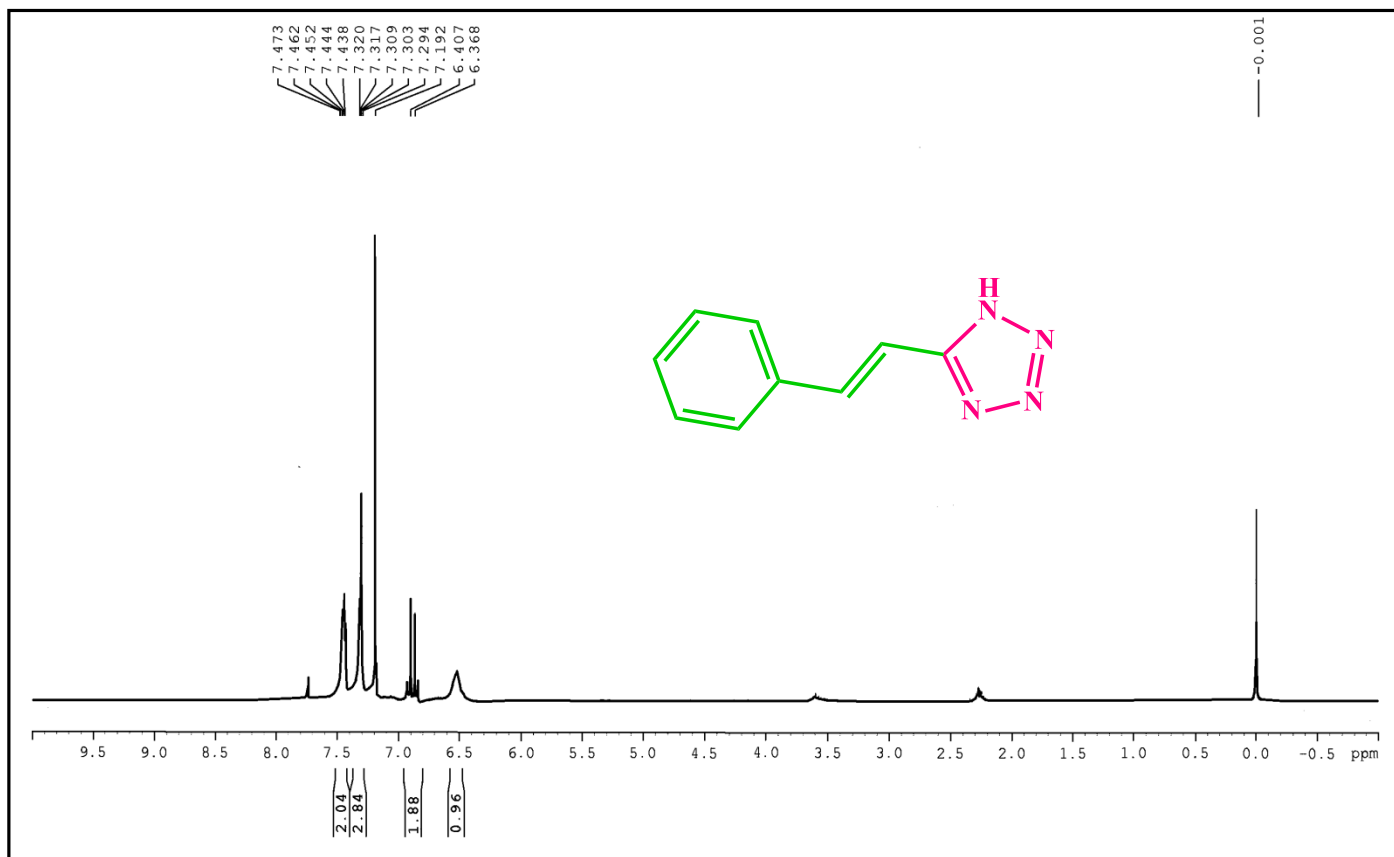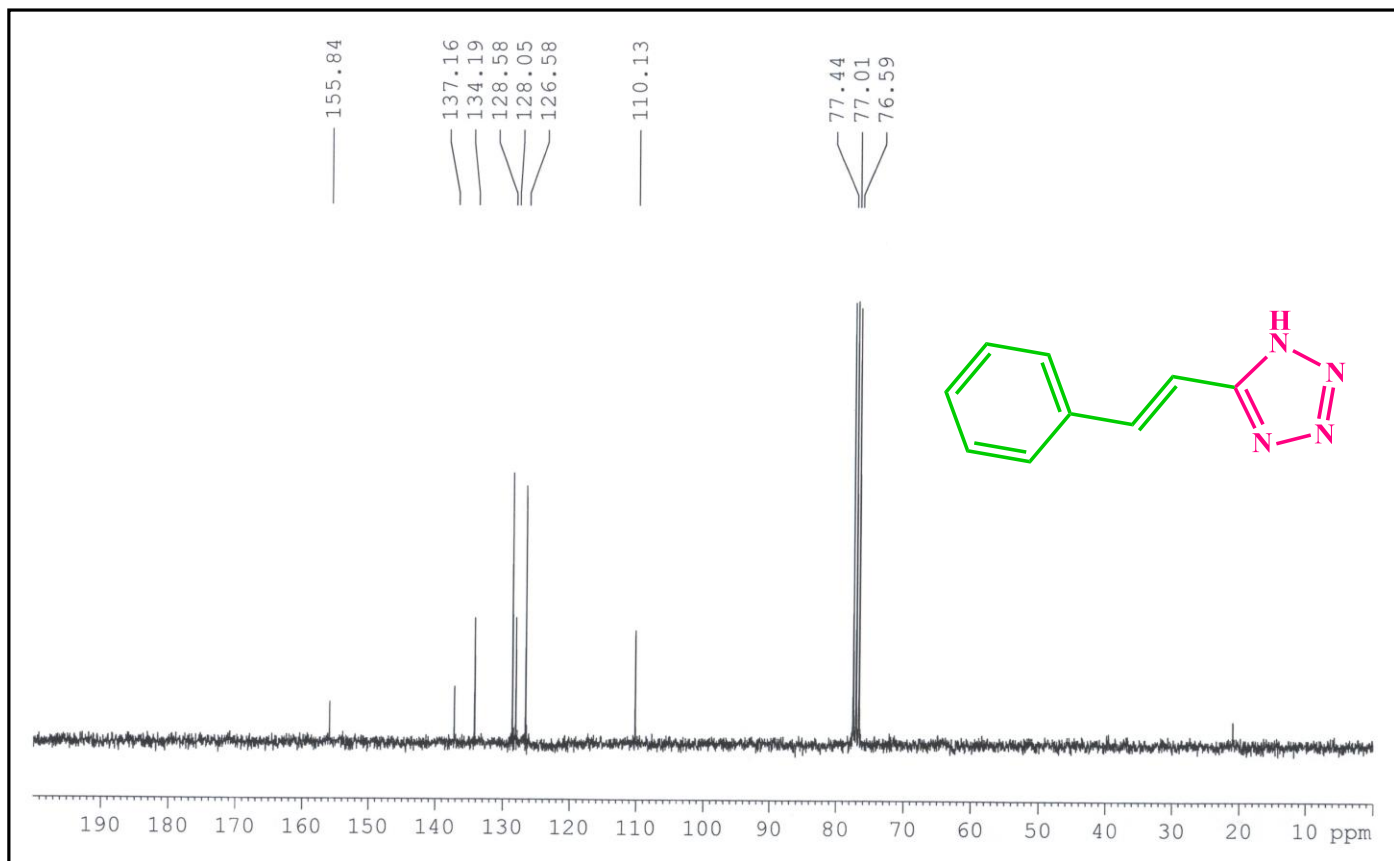



**Figure S20.**  $^1\text{H}$  NMR Spectra of 9-(4-iodophenyl)-9*H*-carbazole (**Compound 5**)

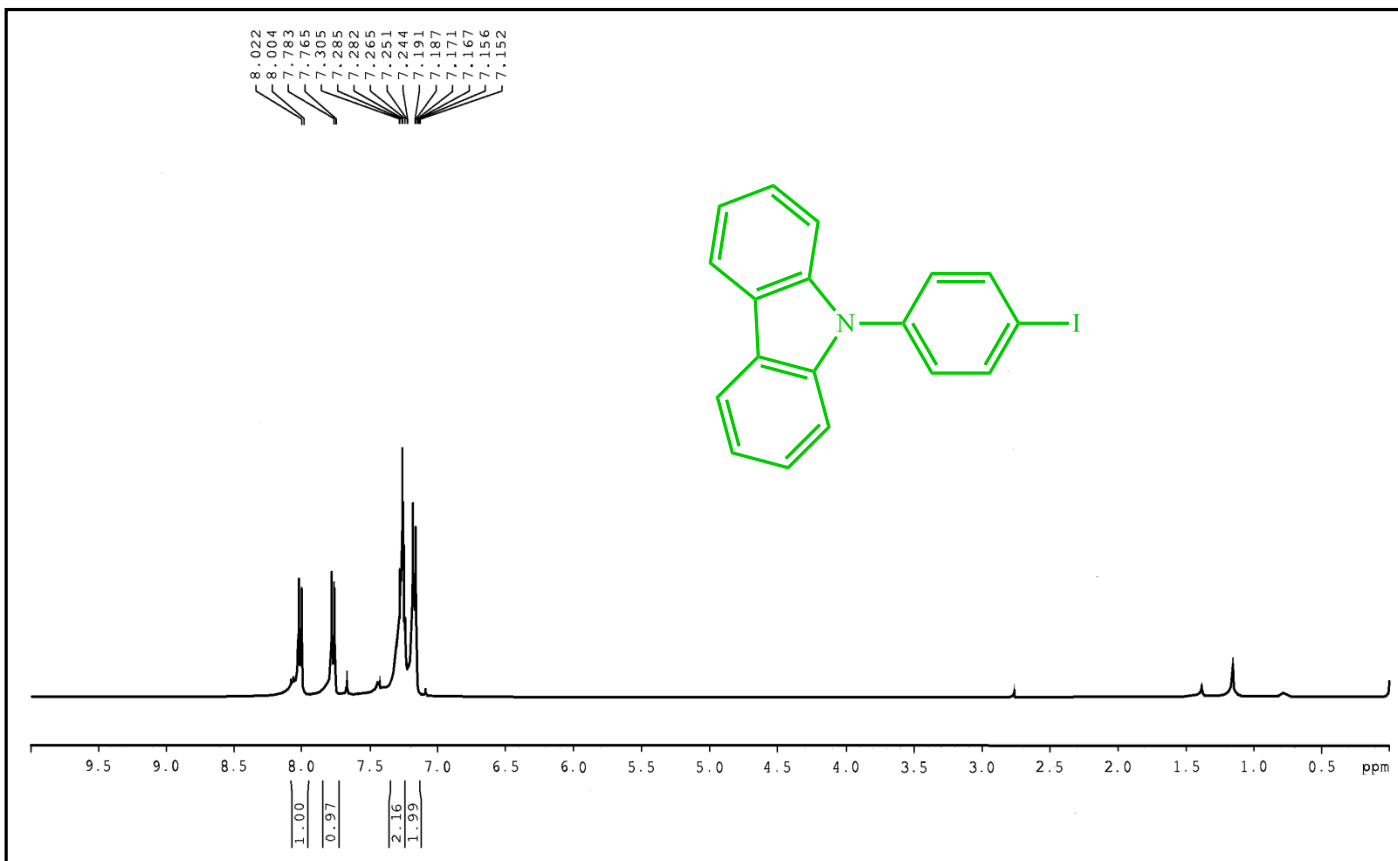

**Figure S21.**  $^1\text{H}$  and  $^{13}\text{C}$  NMR Spectra of 9-(4-iodophenyl)-9*H*-carbazole (**Compound 6**)

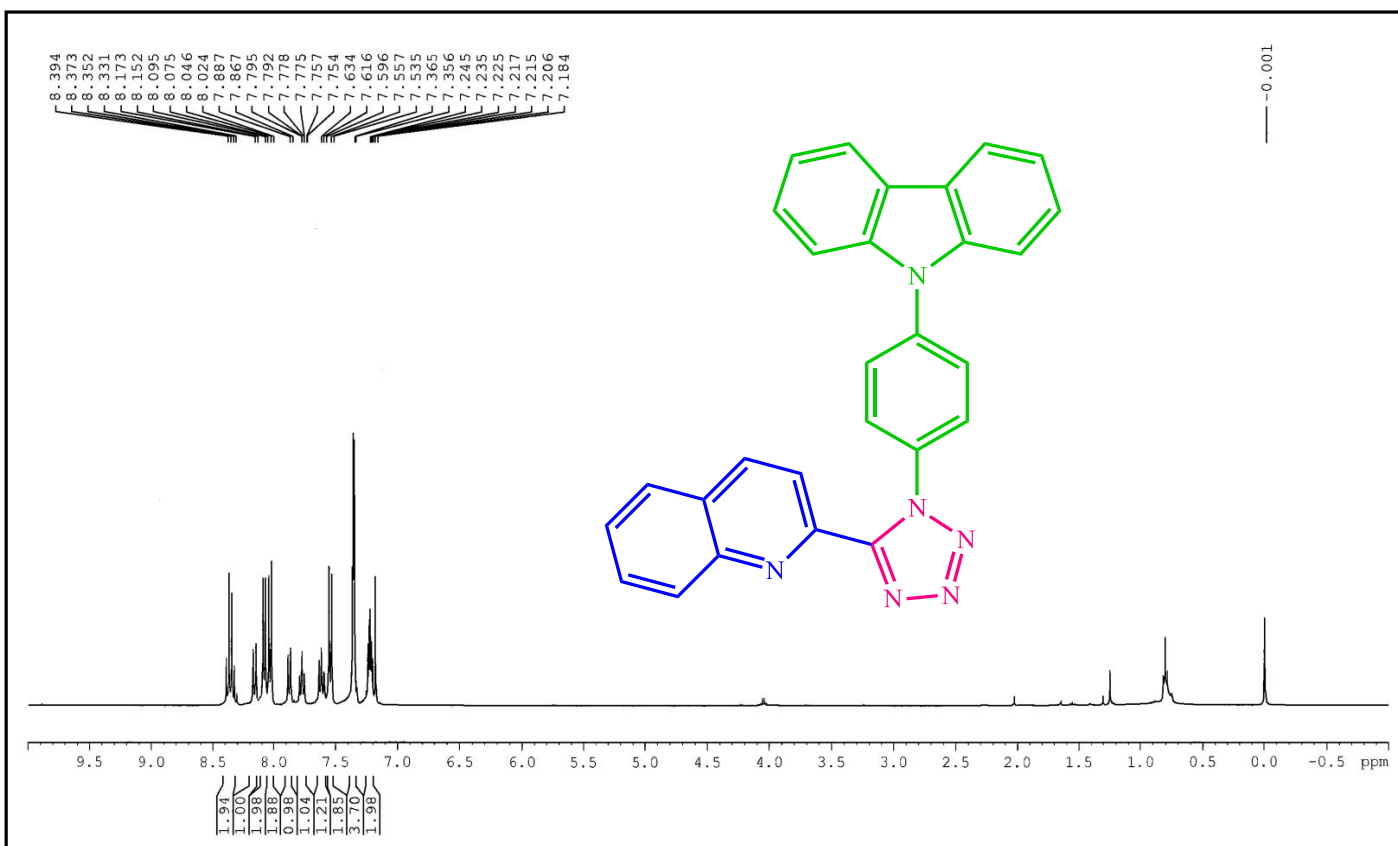

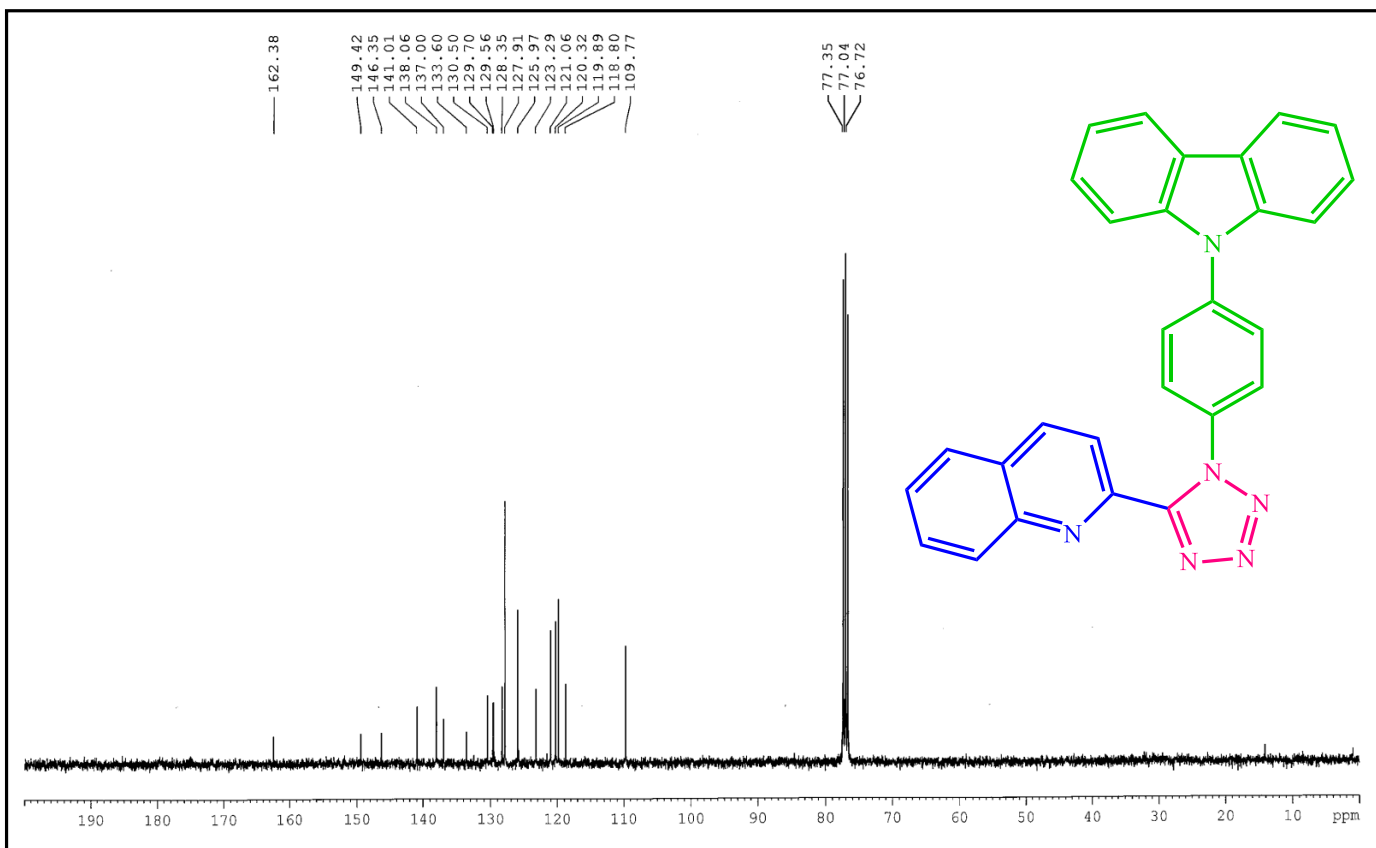

**Figure S22.** ESI-MS of 9-(4-iodophenyl)-9H-carbazole (**Compound 6**)

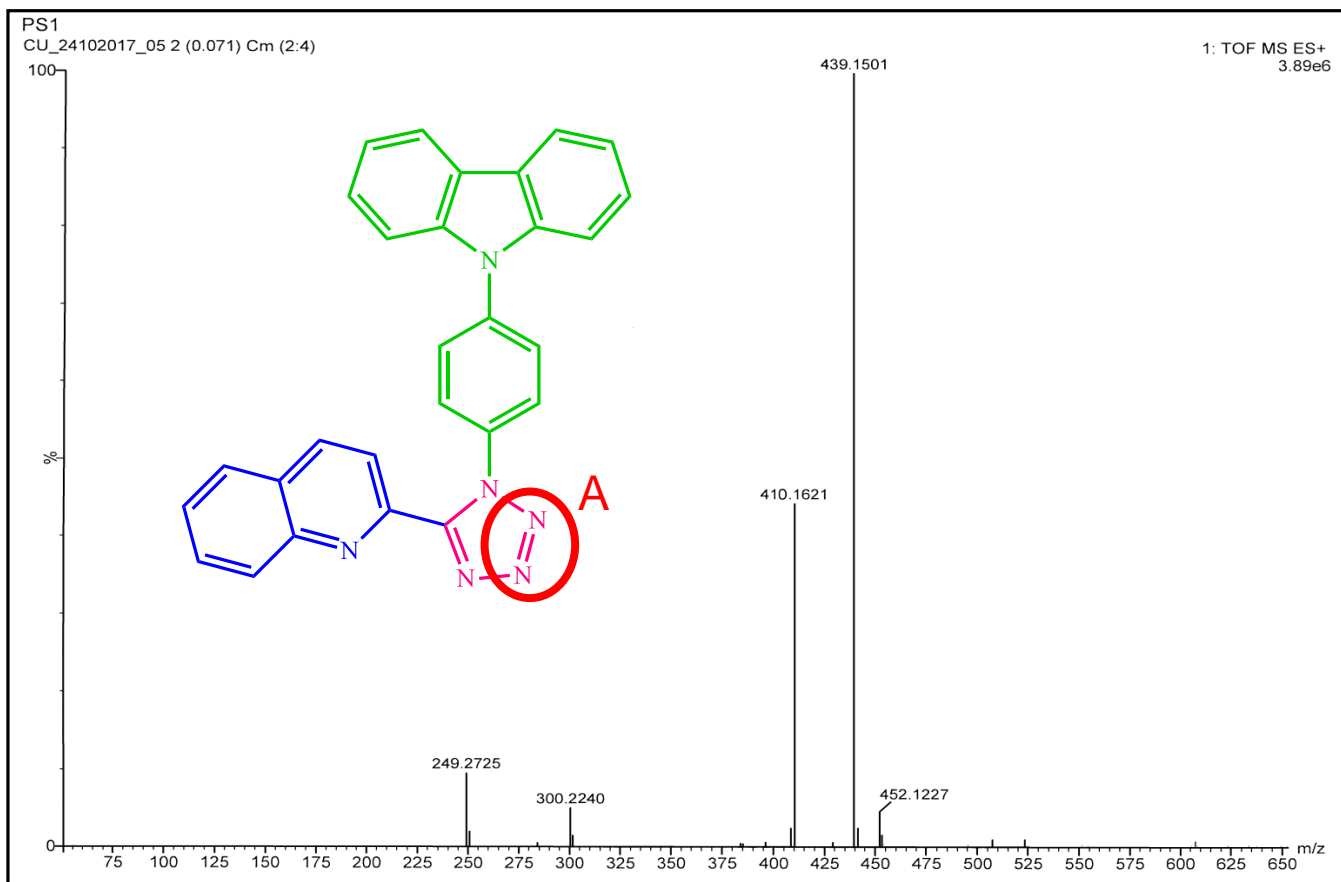

**Figure S23.** ESI-MS of H<sub>2</sub>O<sub>2</sub> treated 9-(4-iodophenyl)-9*H*-carbazole (**Compound 6**)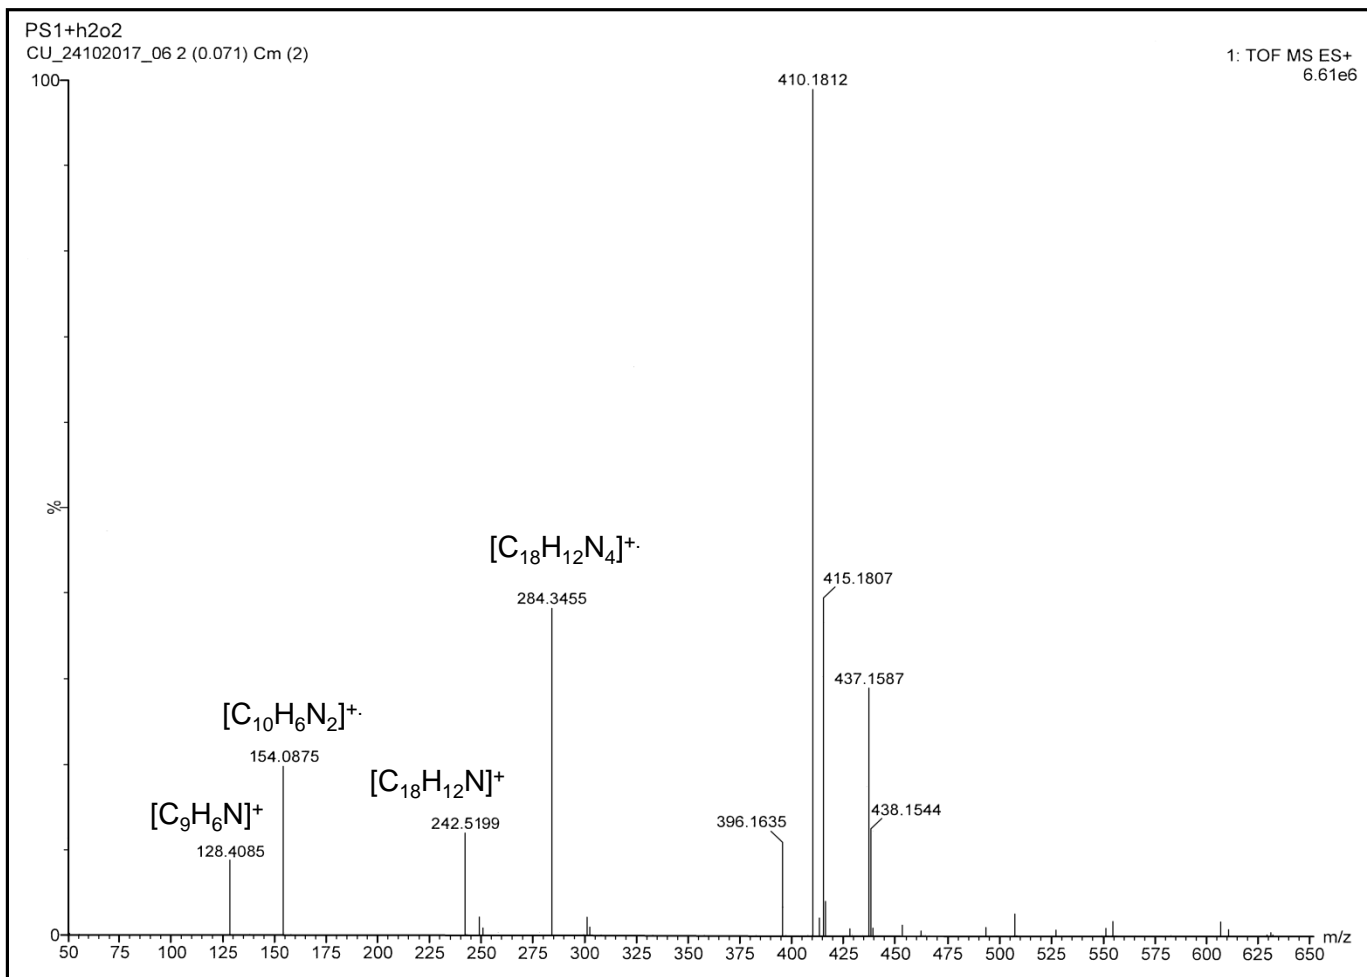**Table S1.** A comparison for the detection of H<sub>2</sub>O<sub>2</sub> sensing

| Method                                                        | LR                                 | LOD ( $\mu$ M)                | Ref.             |
|---------------------------------------------------------------|------------------------------------|-------------------------------|------------------|
| Amperometry (Enzymatic Method)                                | 0.2-3.4 mM                         | 40                            | 10               |
| Amperometry (Non Enzymatic Method)                            | 2.0-80 mM                          | 19.6                          | 11               |
| Chemiluminisence (Enzymatic Method)                           | 0.1-3.0 mM                         | 670                           | 12               |
| Fl-Spectrophotometry (Non Enzymatic Method)                   | 100-4500 $\mu$ M                   | 80                            | 13               |
| CDs nanoprobe-micro fluorospectrometry (Non Enzymatic Method) | 20-20000 $\mu$ M                   | 5                             | 14               |
| SI-LOV Spectrophotometry (Enzymatic Method)                   | 1.3-10 mM                          | 500                           | 15               |
| <b>Spectrofluorimetry (Non Enzymatic Method)</b>              | <b>2.4-16550 <math>\mu</math>M</b> | <b>2.22 <math>\mu</math>M</b> | <b>This work</b> |

LR = Linear range, LOD = Limit of detection ( $3 \times \sigma/s$ )

**Table S2.** A comparison of the catalytic activity of Ni(OH)<sub>2</sub> NPs for the synthesis of 5-substituted 1*H*-tetrazoles with the previous reports.

| Catalyst                              | Reaction Conditions                                                    | T (°C) | t (h) | Yield (%) | Ref.      |
|---------------------------------------|------------------------------------------------------------------------|--------|-------|-----------|-----------|
| Cu(OAc) <sub>2</sub> (25 mol%)        | Benzaldoxime, NaN <sub>3</sub> , DMF                                   | 120    | 12    | 98        | 16        |
| InCl <sub>3</sub> (3 mol%)            | Benzaldoxime, NaN <sub>3</sub> , DMF                                   | 120    | 15    | 92        | 17        |
| -                                     | Benzaldoxime, DPPA, DBU, Toluene                                       | 110    | 16    | 93        | 3         |
| β-Ni(OH) <sub>2</sub> NPs (4.32 mol%) | Benzaldoxime NaN <sub>3</sub> , K <sub>2</sub> CO <sub>3</sub> , Water | reflux | 10    | 98        | This work |

**Figure S24.** FTIR spectrum of reused catalyst.

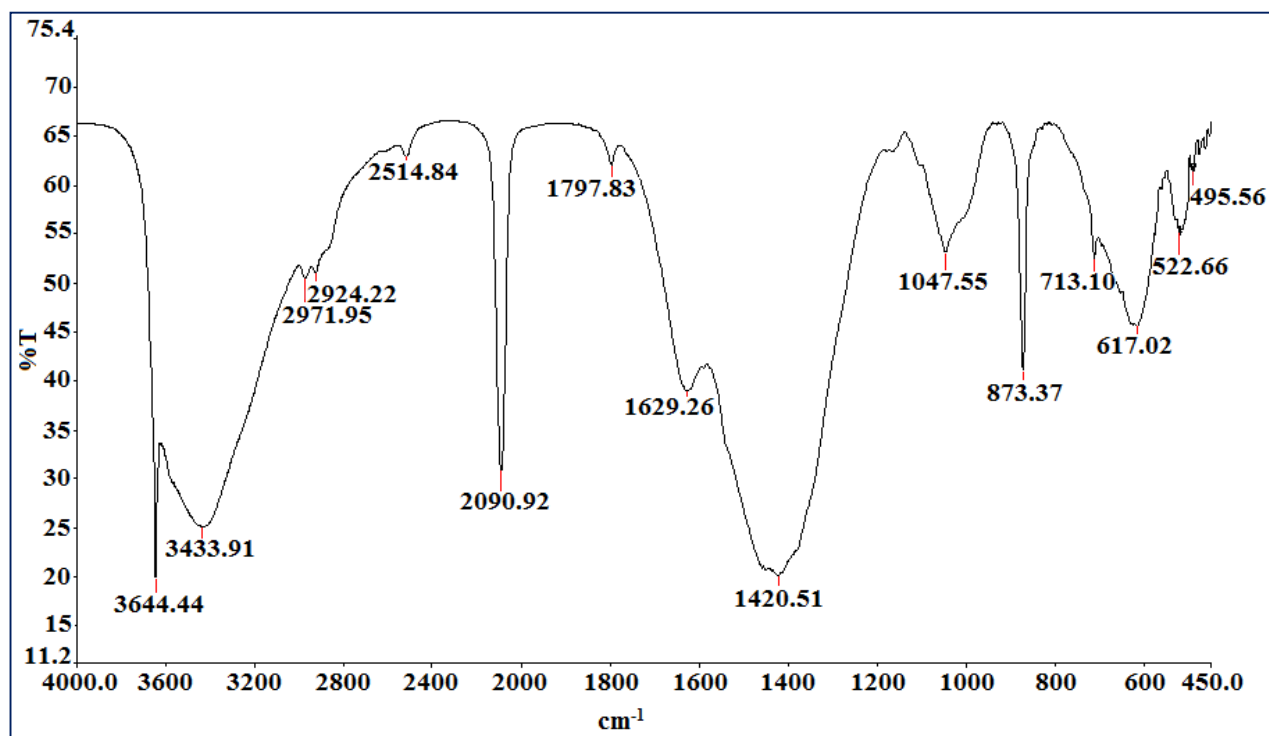

## Reference:

- (1) Kazemnejadi, M.; Sardarian, A. R. Ecofriendly synthesis of a heterogeneous polyvinyl alcohol immobilized copper(II) Schiff base complex as an efficient, reusable catalyst for the one-pot three-component green preparation of 5- substituted 1*H*-tetrazoles under mild conditions. *RSC Adv.*, **2016**, *6*, 91999-92006.
- (2) Bonnamour, J.; Bolm, C. Iron salts in the catalyzed synthesis of 5-substituted 1*H*-tetrazoles. *Chem. Eur. J.* **2009**, *15*, 4543-4545.
- (3) Ishihara, K.; Kawashima, M.; Shioiri, T.; Matsugi, M. Synthesis of 5-substituted 1*H*-tetrazoles from aldoximes using diphenyl phosphorazidate. *Synlett* **2016**, *27*, 2225-2228.
- (4) Nanjundaswamy, H. M.; Abrahamse, H. Green synthesis of 5-substituted-1*H*-1,2,3,4-tetrazoles and 1-sbstituted-1*H*-1,2,3,4-tetrazoles via [3+2] cycloaddition by reusable immobilized AlCl<sub>3</sub> on  $\gamma$ -Al<sub>2</sub>O<sub>3</sub>. *Heterocycles*, **2014**, *89*, 2137-2150.
- (5) Sridhar, M.; Mallu, K. K. R.; Jillella, R.; Godala, K. R.; Beeram, C. R.; Chinthala, N. One-step synthesis of 5-substituted 1*H*-tetrazoles from an aldehyde by reaction with acetohydroxamic acid and sodium azide under Bi(OTf)<sub>3</sub> catalysis. *Synthesis*, **2013**, *45*, 507-510.
- (6) Aridoss, G.; Laali, K. K. Highly efficient synthesis of 5-substituted 1*H*-tetrazoles catalyzed by Cu-Zn alloy nanopowder, conversion into 1,5- and 2,5-disubstituted tetrazoles, and synthesis and NMR studies of new tetrazolium ionic liquids. *Eur. J. Org. Chem.* **2011**, *2011*, 6343-6355.
- (7) Abdollahi-Alieik, M.; Moaddeli, A. Cu-MCM-41 nanoparticles: An efficient catalyst for the synthesis of 5-substituted 1*H*-tetrazoles via [3+2] cycloaddition reaction of nitriles and sodium azide. *J. Chem. Sci.* **2016**, *128*, 93-99.
- (8) Klapötke, T. M.; Stein, M.; Stierstorfer, J. Salts of 1*H*-tetrazole - synthesis, characterization and properties. *Z. Anorg. Allg. Chem.* **2008**, *634*, 1711-1723.
- (9) Demko, Z. P.; Sharpless, K. B. Preparation of 5-substituted 1*H*-tetrazoles from nitriles in water. *J. Org. Chem.* **2001**, *66*, 7945-7950.
- (10) Kozan, J. V. B.; Silva, R. P.; Serrano, S. H. P.; Lima, A. W. O.; Angnes, L. Biosensing hydrogen peroxide utilizing carbon paste electrodes containing peroxidases naturally immobilized on coconut (*Cocos nucifera*L.) fibers. *Anal. Chim. Acta.*, **2007**, *591*, 200-207.

- (11) Marimuthu, T.; Mahmoudian, M. R.; Mohamad, S.; Alias, Y. Synthesis and characterization of non-enzymatic hydrogen peroxide sensor of polypyrrole coated cobalt nanocomposites. *Sens. Actuators B.*, **2014**, *202*, 1037-1043.
- (12) Díaz, A. N.; Peinado, M. C. R.; Minguez, M. C. T. Sol-gel horseradish peroxidase biosensor for hydrogen peroxide detection by chemiluminescence. *Anal. Chim. Acta.*, **1998**, *363*, 221-227.
- (13) Ribeiro, J. P. N.; Segundo, M. A.; Reis, S.; Lima, J. L. F. C. Spectrophotometric FIA methods for determination of hydrogen peroxide: Application to evaluation of scavenging capacity. *Talanta*. **2009**, *79*, 1169-1176.
- (14) Costas-Mora, I.; Romero, V.; Lavilla, I.; Bendicho, C. In situ photochemical synthesis of fluorescent carbon dots for optical sensing of hydrogen peroxide and antioxidants. *Talanta*. **2015**, *144*, 1308-1315.
- (15) Vidigal, S. S. M. P.; Tóth, I. V.; Rangel, A. O. S. S. Sequential injection lab-on-valve system for the on-line monitoring of hydrogen peroxide in lens care solutions. *Microchem. J.* **2009**, *91*, 197-201.
- (16) Patil, U. B.; Kumthekar, K. R.; Negarkar, J. M. A novel method for the synthesis of 5-substituted 1*H*-tetrazole from oxime and sodium azide. *Tetrahedron Lett.* **2012**, *53*, 3706-3709.
- (17) Guggilapu, S. D.; Prajapati, S. K.; Nagarsenkar, A.; Gupta, K. K.; Babu, B. N. Indium(III) chloride catalyzed synthesis of 5-substituted 1*H*-tetrazoles from oximes and sodium azide. *Synlett*. **2016**, *27*, 1241-1244.
